# Supplementary material
Source: publisher figshare collection journal article supplement (https://geolsoc.figshare.com/ndownloader/files/24182627)
Supplement: Supplementary file 1 [file 24182627]

## Sheet: BH-18-03 Standard Data
	Standards: GA1550					Lab #: 1184					Age3: 99.738 ± 0.104 Ma										Heating: 5 s
	Irradiation coordinates: B1
		Power				40Ar*	±σ	39Ar	±σ	38Ar	±σ	37Ar	±σ	36Ar	±σ	D1	±σ	%40Ar*	40Ar*/39ArK	±σ	Ca/K	±σ	Δt	Blank	40Ar	±σ	39Ar	±σ	38Ar	±σ	37Ar	±σ	36Ar	±σ
		(W)				(cps)	(cps)	(cps)	(cps)	(cps)	(cps)	(cps)	(cps)	(cps)	(cps)								(days)	Type2	(cps)	(cps)	(cps)	(cps)	(cps)	(cps)	(cps)	(cps)	(cps)	(cps)
	1184-01	0.6				483341	984.437	22274.4	41.2927	111.715	4.27798	96.3639	5.48587	181.412	3.19963	1.00406	0.0015106	90	21.6994	0.0597617	0.008	0.0009	55	LR	4961.66	22.1737	179.434	0.959563	4.81046	0.507375	255.543	1.10816	24.8844	1.20037
	1184-02	0.6				323866	869.68	14839.5	31.3203	83.9129	3.44657	28.4707	5.32162	153.82	2.84458	1.004	0.0015006	88	21.8246	0.0745417	0.0036	0.0012	55	LR	4959.58	19.9454	180.657	0.88426	5.02312	0.504823	255.875	1.0286	24.8512	1.11371
	1184-03	0.6				357566	959.278	16429.9	34.309	81.8996	3.11496	50.2893	5.21669	187.401	3.14932	1.00394	0.0014906	86	21.7631	0.073988	0.006	0.001	55	LR	4957.49	18.6228	181.878	1.01896	5.23549	0.560551	256.208	0.967068	24.818	1.04618
	1184-04	0.6				311687	723.231	14472.6	29.3319	50.8935	2.9454	37.5542	4.62059	52.3258	2.37508	1.00387	0.0014806	95	21.5363	0.0663503	0.0048	0.0011	55	LR	4953.36	19.2823	183.419	1.14962	5.5068	0.519713	256.866	0.911344	24.7523	0.982952
	1184-05	0.6				452761	1062.96	20655	38.0804	102.573	3.75405	57.6445	4.88957	174.885	3.46287	1.00381	0.0014706	90	21.9202	0.065434	0.0052	0.0008	55	LR	4951.28	21.1673	183.744	1.01701	5.5668	0.449562	257.199	0.920685	24.7192	0.991205
	1184-06	0.6				450681	873.599	20841.1	40.6884	111.743	3.23267	46.6136	5.19895	127.792	2.84412	1.00375	0.0014606	92	21.6246	0.059493	0.0042	0.0009	55	LR	4949.19	23.8136	184.069	0.914487	5.62684	0.485835	257.531	0.954868	24.686	1.02628
	1184-08	0.6				121331	958.187	5621.33	17.9983	41.9178	2.13881	22.4599	9.03166	114.568	3.18486	1.00362	0.0014405	78	21.5841	0.183932	0.00743	0.00556	55	LR	4947.58	24.6059	185.038	0.881532	5.71894	0.547572	258.522	1.17535	24.5871	1.25974
	1184-09	0.6				412947	1069.77	19051.5	36.3184	117.292	3.45521	156.152	6.33713	224.53	3.50475	1.00356	0.0014305	86	21.6754	0.0697164	0.0152	0.0012	55	LR	4947.84	23.615	185.393	0.976851	5.7366	0.518429	258.885	1.28755	24.5509	1.37961
	Weighted mean J:					0.0026120 ± 0.0000041 (0.16%)
	Standards: GA1550					Lab #: 1185					Age3: 99.738 ± 0.104 Ma										Heating: 5 s
	Irradiation coordinates: B3
		Power				40Ar*	±σ	39Ar	±σ	38Ar	±σ	37Ar	±σ	36Ar	±σ	D1	±σ	%40Ar*	40Ar*/39ArK	±σ	Ca/K	±σ	Δt	Blank	40Ar	±σ	39Ar	±σ	38Ar	±σ	37Ar	±σ	36Ar	±σ
		(W)				(cps)	(cps)	(cps)	(cps)	(cps)	(cps)	(cps)	(cps)	(cps)	(cps)								(days)	Type2	(cps)	(cps)	(cps)	(cps)	(cps)	(cps)	(cps)	(cps)	(cps)	(cps)
	1185-01	0.6				172075	802.336	7892.35	19.5341	39.5048	3.01177	29.2774	5.21596	50.141	2.66567	1.00359	0.0014089	92	21.8027	0.115095	0.0069	0.0023	55	LR	4948.73	22.4372	186.345	0.880522	5.79673	0.458016	260.253	0.96013	24.5227	1.24003
	1185-02	0.6				368954	819.042	17221.3	31.2892	90.5081	3.65803	90.1192	5.26073	96.5155	2.67328	1.00369	0.0013973	93	21.4243	0.0614586	0.0097	0.0011	55	LR	4948.97	22.7479	186.576	0.987177	5.81291	0.454158	260.634	0.976346	24.5245	1.16771
	1185-03	0.6				211431	872.324	9831.11	22.6331	38.696	2.36352	47.5543	5.477	74.7123	2.90081	1.00379	0.0013856	90	21.5063	0.10161	0.009	0.0019	55	LR	4949.21	23.316	186.807	1.16908	5.82909	0.456047	261.015	1.09865	24.5263	1.11216
	1185-04	0.6				137777	671.568	6413.61	15.7867	35.7107	2.21949	31.9917	4.96161	57.1793	2.23253	1.00389	0.001374	89	21.482	0.117303	0.0093	0.0027	55	LR	4949.69	25.1367	187.173	1.30433	5.86129	0.476433	261.556	1.17718	24.5299	1.06103
	1185-05	0.6				377684	831.092	17455.4	33.8168	86.5856	3.47763	38.4469	5.43062	82.7195	2.70715	1.00399	0.0013624	94	21.637	0.0634352	0.0041	0.0011	55	LR	4949.92	26.3497	187.308	1.21439	5.87746	0.494333	261.714	1.07	24.5317	1.0681
	1185-07	0.6				320341	1048.32	14849.2	26.1684	103.753	3.0703	54.1503	4.91779	193.69	3.45172	1.00419	0.0013391	85	21.573	0.0801839	0.0068	0.0011	55	LR	4950.64	30.8651	187.713	1.0122	5.9257	0.572093	262.188	0.919322	24.5371	1.21122
	1185-08	0.6				256356	740.954	11880	24.7371	39.2145	2.89786	42.5501	5.46908	30.9695	2.4277	1.00429	0.0013275	97	21.5787	0.0768692	0.0067	0.0016	55	LR	4950.88	32.6101	187.849	0.974294	5.94188	0.604579	262.347	0.94076	24.5389	1.29257
	1185-09	0.6				153964	777.596	7261.04	18.7045	50.6967	2.09303	23.6495	5.06311	70.7727	2.58774	1.00439	0.0013158	88	21.2041	0.120217	0.0061	0.0024	55	LR	4951.12	34.443	187.984	0.95495	5.95805	0.639511	262.506	0.997694	24.5407	1.38629
	Weighted mean J:					0.0026334 ± 0.0000046 (0.17%)
	Standards: GA1550					Lab #: 1186					Age3: 99.738 ± 0.104 Ma										Heating: 5 s
	Irradiation coordinates: B5
		Power				40Ar*	±σ	39Ar	±σ	38Ar	±σ	37Ar	±σ	36Ar	±σ	D1	±σ	%40Ar*	40Ar*/39ArK	±σ	Ca/K	±σ	Δt	Blank	40Ar	±σ	39Ar	±σ	38Ar	±σ	37Ar	±σ	36Ar	±σ
		(W)				(cps)	(cps)	(cps)	(cps)	(cps)	(cps)	(cps)	(cps)	(cps)	(cps)								(days)	Type2	(cps)	(cps)	(cps)	(cps)	(cps)	(cps)	(cps)	(cps)	(cps)	(cps)
	1186-01	0.6				183537	818.532	8545.25	19.5491	46.4701	2.36692	63.5616	5.37979	90.5952	2.71229	1.00445	0.0013013	87	21.4782	0.107655	0.0138	0.0022	55	LR	4949.81	36.8583	188.501	1.05733	5.91441	0.56092	263.224	1.02829	24.5405	1.2625
	1186-02	0.6				351637	790.781	16321.9	29.8615	86.5131	3.35725	99.3058	5.66983	68.4557	2.56761	1.00441	0.0012984	95	21.5439	0.0624571	0.0113	0.0012	55	LR	4947.6	33.6203	188.649	1.13065	5.88984	0.523647	263.523	0.883489	24.5396	1.18432
	1186-03	0.6				191005	856.987	8938.91	21.4827	56.7456	2.45876	68.5266	5.51859	95.9598	2.83354	1.00437	0.0012955	87	21.3678	0.108759	0.0143	0.0021	55	LR	4945.57	30.956	188.784	1.21045	5.8673	0.496588	263.796	0.959915	24.5388	1.12396
	1186-04	0.6				352694	791.25	16278.1	29.0477	66.192	3.14629	56.6135	5.5004	56.405	2.5861	1.00433	0.0012926	95	21.6668	0.0621097	0.0065	0.0012	55	LR	4941.56	26.8841	188.756	1.0221	5.8227	0.467615	264.255	1.09047	24.5372	1.04369
	1186-05	0.6				150179	695.257	6989.6	17.5619	37.9622	2.418	21.2489	5.33776	56.9563	2.30542	1.00429	0.0012897	90	21.486	0.113176	0.0057	0.0026	55	LR	4939.53	25.6291	188.589	0.855672	5.80016	0.466952	264.443	1.00447	24.5364	1.02608
	1186-06	0.6				285303	1218.94	13121.5	26.2148	97.43	3.29983	24.0509	5.49977	250.943	4.02352	1.00425	0.0012868	79	21.7431	0.102551	0.0034	0.0015	55	LR	4937.32	25.0118	188.407	0.88894	5.77559	0.477171	264.649	0.948688	24.5355	1.02589
	1186-07	0.6				484521	1053.66	22253.5	38.6348	132.236	3.69222	53.4943	5.28007	224.236	3.44238	1.00421	0.0012839	88	21.7728	0.0605862	0.0045	0.0008	56	LR	4933.31	26.0249	188.137	0.930939	5.7309	0.522336	265.023	0.967361	24.5339	1.07562
	1186-08	0.6				455788	849.495	21067.3	36.7928	94.4553	3.82931	123.236	5.17288	101.738	2.74466	1.00417	0.0012811	94	21.6348	0.0552589	0.0109	0.0009	56	LR	4931.28	27.5035	188.033	0.814114	5.70838	0.555951	265.212	1.03354	24.533	1.12298
	1186-09	0.6				230185	891.91	10666.2	23.4354	66.7521	2.88655	57.3891	5.8294	107.883	2.95644	1.00414	0.0012782	88	21.5807	0.0961281	0.01	0.0019	56	LR	4929.25	29.5201	187.928	0.778448	5.68581	0.595379	265.401	1.1304	24.5322	1.18322
	Weighted mean J:					0.0026228± 0.0000042 (0.16%)
	Explanations
	D1: Mass discrimination per AMU based on power law (Renne et al., 2009)
	Blank Type2: Ave = average; LR = linear regression versus time
	Age3: Standard Age of Renne et al., (2011)
	Δt = Time interval (days) between end of irradiation and analysis
	N.D. = negative values indicate that the value is indistinguishable from the background
	Constants Used									Reference
	Atmospheric argon ratios
	(40Ar/36Ar)A					298.56 ± 0.31				Lee et al., (2006)
	Interfering isotope production ratios
	Derived from co-irradiated Fe-doped kalsilite and from CaF2
	(40Ar/39Ar)K					4.7053E-05 ± 1.7377E-05
	(38Ar/39Ar)K					1.1846E-02 ± 5.4865E-05
	(37Ar/39Ar)K					9.8938E-04 ± 8.1820E-05
	(39Ar/37Ar)Ca					6.6527E-04 ± 2.6791E-05
	(38Ar/37Ar)Ca					2.1993E-05 ± 1.7021E-06
	(36Ar/37Ar)Ca					2.7556E-04 ± 2.1719E-06
	(36Cl/38Cl)Cl					263 ± 2
	Decay Constants
	40K λε					5.757E-11 ± 0.016E-11				Renne et al., (2011)
	40K λβ					4.9548E-10 ± 0.0134E-10				Renne et al., (2011)
	39Ar					2.58E-3 ± 2.87E-05 a-1				Stoenner et al. (1965)
	37Ar					7.24E0 ± 1.66E-02 a-1				Renne & Norman (2001)
	36Cl λβ					(2.305)E-6 a-1				Endt (1998)

## Sheet: BH-18-03
	Sample: BH-18-03		Lab #: 1187					J: 0.0026227 ± 0.0000024 (0.09%)
	Material: Muscovite
	Irradiation coordinates: B7																											Blank Corrections												Inverse Isochron
	Run ID	Power	40Ar*	± σ	40Ar	± σ	39Ar	± σ	38Ar	± σ	37Ar	± σ	36Ar	± σ	D1	± σ	%40Ar*	40Ar*/39ArK	±σ	Age	±1σ	1σ (-J)	±2σ	2σ (-J)	Ca/K	± σ	Δt	Blank	40Ar	± σ	39Ar	± σ	38Ar	± σ	37Ar	± σ	36Ar	± σ		39Ar/40Ar	1SD	36Ar/40Ar	1SD
		(watts)	(cps)	(cps)	(cps)	(cps)	(cps)	(cps)	(cps)	(cps)	(cps)	(cps)	(cps)	(cps)						(Ma)	(Ma)	(M1)	(Ma)	(Ma)			(days)	Type2	(cps)	(cps)	(cps)	(cps)	(cps)	(cps)	(cps)	(cps)	(cps)	(cps)
	1187-02A	0.5	25356.4	708.597	32872.5	45.8145	302.791	4.89968	6.47148	0.759999	45.2661	7.50641	25.1745	2.36827	1.00205	0.0012869	77.1356	83.7423	2.70424	359.009	10.5192	10.5149	21.0384	21.0297	0.278063	0.012146	68	LR	6260.86	12.766	164.455	0.833732	6.23891	0.515691	222.855	1.03359	28.3535	1.04462		0.00921106	0.000149603	0.000765823	7.20521e-05
	1187-02B	0.75	75976.9	650.667	93881.3	57.1315	781.278	5.37288	10.4928	1.01982	453.746	7.90716	59.9694	2.17004	1.00242	0.0013063	80.9286	97.2469	1.06811	410.77	4.05028	4.0359	8.10057	8.0718	1.08024	0.0077569	68	LR	6271.28	11.314	165.67	0.793425	6.21959	0.460043	222.804	0.960432	28.5488	0.954795		0.00832197	5.74542e-05	0.000638778	2.3118e-05
	1187-02C	0.8	41807	562.839	45785.3	39.0961	430.197	4.63072	1.73975	0.895422	323.25	13.5866	13.325	1.88057	1.00279	0.0013258	91.3109	97.181	1.67511	410.521	6.33955	6.33038	12.6791	12.6608	1.3976	0.0175131	68	LR	6281.43	12.6295	164.88	0.855678	6.20076	0.424954	222.754	0.910302	28.7392	1.0973		0.00939596	0.000101458	0.000291033	4.10745e-05
	1187-02D	1	155816	595.759	163466	81.0534	1589.88	7.38487	3.19422	1.19509	116.701	12.0105	25.6236	1.97671	1.00316	0.0013452	95.32	98.0048	0.589613	413.632	2.25068	2.22436	4.50135	4.44873	0.136528	0.00208025	68	LR	6292.72	13.025	164.159	0.792786	6.16339	0.42765	222.654	0.88544	28.8535	1.1099		0.00972605	4.54334e-05	0.000156751	1.20927e-05
	1187-02E	1.1	212762	634.814	223920	110.741	2148.59	8.10818	6.69855	1.40065	27.6054	12.0506	37.3723	2.09329	1.00353	0.0013647	95.017	99.0243	0.476382	417.474	1.82645	1.79338	3.65289	3.58675	0.0238976	0.0046441	68	LR	6293.86	12.7914	164.229	0.707117	6.14456	0.465031	222.604	0.912577	28.7757	0.989964		0.00959533	3.65198e-05	0.0001669	9.34876e-06
	1187-02F	1.2	380615	647.11	392245	190.632	3861.51	12.2896	8.90753	1.62542	36.2063	11.7553	38.9536	2.07086	1.0039	0.0013841	97.035	98.5664	0.355653	415.749	1.38378	1.34016	2.76757	2.68032	0.0174397	0.0018939	68	LR	6295	15.5039	165.299	0.789727	6.12569	0.520904	222.554	0.964158	28.6978	1.10562		0.00984464	3.16948e-05	9.93093e-05	5.27973e-06
	1187-02G	1.3	227522	576.551	230209	140.914	2326.9	9.9801	0.14406	1.39788	16.8673	6.23583	8.99708	1.87252	1.00444	0.0013543	98.8332	97.7792	0.487103	412.78	1.87014	1.8385	3.74027	3.677	0.0134828	0.00190063	68	LR	6208.42	16.0251	170.962	0.72396	6.33633	0.443922	221.429	0.874009	27.1762	1.0645		0.0101078	4.37917e-05	3.90823e-05	8.13404e-06
	Plateau Age:			414.9 ± 1.7 Ma (2SD)
	Sample: BH-18-03		Lab #: 1187					J: 0.0026227 ± 0.0000024 (0.09%)
	Material: Muscovite
	Irradiation coordinates: B7																											Blank Corrections												Inverse Isochron
	Run ID	Power	40Ar*	± σ	40Ar	± σ	39Ar	± σ	38Ar	± σ	37Ar	± σ	36Ar	± σ	D1	± σ	%40Ar*	40Ar*/39ArK	±σ	Age	±1σ	1σ (-J)	±2σ	2σ (-J)	Ca/K	± σ	Δt	Blank	40Ar	± σ	39Ar	± σ	38Ar	± σ	37Ar	± σ	36Ar	± σ		39Ar/40Ar	1SD	36Ar/40Ar	1SD
		(watts)	(cps)	(cps)	(cps)	(cps)	(cps)	(cps)	(cps)	(cps)	(cps)	(cps)	(cps)	(cps)						(Ma)	(Ma)	(M1)	(Ma)	(Ma)			(days)	Type2	(cps)	(cps)	(cps)	(cps)	(cps)	(cps)	(cps)	(cps)	(cps)	(cps)
	1187-04A	0.5	13599.3	518.931	17963.7	31.6465	153.871	3.46271	2.60892	0.769623	15.1446	6.92185	14.6183	1.73481	1.00373	0.0014955	75.7041	88.3811	3.91531	376.956	15.0768	15.0735	30.1536	30.147	0.183068	0.0423621	70	LR	5865.76	16.5075	170.903	0.973539	6.55906	0.429791	214.033	1.06569	23.1266	0.977036		0.00856564	0.000193351	0.000813771	9.65836e-05
	1187-04B	0.7	38991.7	502.909	41897.2	43.3787	388.037	4.3429	0.90615	0.943183	22.923	6.65261	9.73147	1.67814	1.00355	0.0014742	93.0653	100.484	1.71594	422.962	6.44973	6.44022	12.8995	12.8804	0.109878	0.0104842	70	LR	5856.12	14.1673	171.052	0.864334	6.40063	0.388905	213.752	0.959579	23.228	0.8803		0.00926166	0.000104099	0.00023227	4.00545e-05
	1187-04C	0.8	44338.6	442.821	46656.9	45.599	440.257	4.14113	-0.088363	0.903732	31.3422	5.84078	7.76501	1.47528	1.00337	0.0014529	95.0311	100.711	1.38169	423.811	5.19512	5.18327	10.3902	10.3665	0.132415	0.00584406	70	LR	5846.48	15.1746	171.2	0.783587	6.24209	0.440753	213.472	0.895882	23.3296	0.822889		0.00943605	8.92349e-05	0.000166428	3.16202e-05
	1187-04D	0.9	235794	515.245	237987	140.841	2417.32	9.51138	0.788661	1.40599	30.4594	6.23626	7.34577	1.66002	1.00319	0.0014316	99.0785	97.5436	0.439018	411.891	1.69271	1.65783	3.38541	3.31565	0.0234369	0.00107466	70	LR	5875.85	15.3679	171.494	0.74191	5.96528	0.477177	212.918	0.924111	23.5301	0.85156		0.0101574	4.04155e-05	3.08663e-05	6.9753e-06
	1187-04E	1	295000	514.316	296053	170.623	3004.48	11.8461	0.683484	1.20771	31.2985	6.80643	3.52688	1.62509	1.00301	0.0014103	99.6443	98.1867	0.423289	414.318	1.63286	1.59629	3.26572	3.19257	0.0193761	0.000992741	70	LR	5919.24	14.5725	171.656	0.792712	5.83345	0.422794	212.613	1.02161	23.6405	0.942468		0.0101485	4.04385e-05	1.1913e-05	5.4892e-06
	1187-04F	1	128139	560.75	132294	79.8815	1306.52	6.8251	3.76299	1.03329	39.9846	7.45271	13.9168	1.85897	1.00283	0.001389	96.8593	98.0766	0.668354	413.903	2.54432	2.52104	5.08863	5.04208	0.056923	0.00227493	70	LR	5959.03	17.2353	171.804	0.877704	5.71257	0.420775	212.333	1.1482	23.7418	1.05976		0.00987588	5.19337e-05	0.000105196	1.40519e-05
	1187-04G	1.1	216668	642.107	230030	130.584	2208.19	7.86552	5.27286	1.22205	25.1828	6.59782	44.7543	2.10522	1.00269	0.0013581	94.1913	98.1201	0.454649	414.067	1.74885	1.71479	3.4977	3.42958	0.0212119	0.00153159	70	LR	5895.69	12.3328	171.311	0.86291	5.15022	0.489422	212.185	1.06102	24.4719	0.81838		0.00959959	3.4625e-05	0.000194559	9.15262e-06
	1187-04H	1.1	182701	528.17	189445	99.784	1849.56	8.24393	5.04993	1.29021	25.3088	6.28704	22.5898	1.73704	1.00273	0.0013485	96.4399	98.7806	0.524787	416.556	2.00654	1.9766	4.01308	3.95321	0.0254516	0.00168404	70	LR	5833.06	12.4839	171.117	0.733732	4.91445	0.428034	212.2	0.942109	24.7033	0.829387		0.00976304	4.3819e-05	0.000119242	9.16933e-06
	1187-04I	1.2	374708	599.555	384321	210.567	3790.35	11.2639	6.48342	1.41524	26.996	6.07816	32.1972	1.87994	1.00277	0.0013389	97.4988	98.8585	0.333659	416.85	1.30316	1.25652	2.60632	2.51304	0.0132475	0.000710919	70	LR	5770.56	15.4406	170.924	0.777052	4.67915	0.468393	212.215	0.856369	24.9343	0.931567		0.00986246	2.98026e-05	8.37769e-05	4.89179e-06
	1187-04J	1.2	207949	476.411	209725	121.016	2133.26	8.17103	1.70789	1.21284	24.2872	5.99946	5.94745	1.54334	1.00281	0.0013293	99.1533	97.4795	0.435067	411.649	1.67828	1.64313	3.35655	3.28625	0.0211761	0.00137327	70	LR	5699.63	15.6466	170.62	0.78863	4.58963	0.467873	212.245	0.821148	25.1975	0.94252		0.0101717	3.94003e-05	2.83583e-05	7.35891e-06
	1187-04K	1.3	337451	564.135	340351	210.41	3422.53	11.0252	2.73364	1.48917	25.6385	6.13532	9.71012	1.75314	1.00285	0.0013197	99.1482	98.5971	0.357839	415.865	1.3917	1.34831	2.7834	2.69662	0.0139335	0.000842783	70	LR	5691.12	13.1359	170.506	0.770656	4.73869	0.417199	212.26	0.87697	25.2301	0.867248		0.0100559	3.29848e-05	2.85298e-05	5.15102e-06
	1187-04L	1.3	205126	537.851	205425	100.932	2092.8	8.43688	1.42502	1.21223	14.4018	6.38094	1.00104	1.76948	1.00289	0.0013101	99.8545	98.015	0.471361	413.67	1.81102	1.77821	3.62205	3.55642	0.0127997	0.00256428	70	LR	5682.61	13.6855	170.393	0.931047	4.88795	0.466004	212.275	0.973556	25.2628	0.899991		0.0101877	4.13743e-05	4.873e-06	8.61374e-06
	Plateau Age:			414.7 ± 1.1 Ma (2SD)
	Explanations
	D1: Mass discrimination per AMU based on power law (Renne et al., 2009)
	Blank Type2: Ave = average; LR = linear regression versus time
	Δt = Time interval (days) between end of irradiation and analysis
	N.D. = negative values indicate that the value is indistinguishable from the background
	Constants Used									Reference
	Atmospheric argon ratios
	(40Ar/36Ar)Air				298.56 ± 0.31					Lee et al., (2006)
	Interfering isotope production ratios
	Derived from co-irradiated Fe-doped kalsilite and from CaF2
	(40Ar/39Ar)K				4.7053E-05 ± 1.7377E-05
	(38Ar/39Ar)K				1.1846E-02 ± 5.4865E-05
	(37Ar/39Ar)K				9.8938E-04 ± 8.1820E-05
	(39Ar/37Ar)Ca				6.6527E-04 ± 2.6791E-05
	(38Ar/37Ar)Ca				2.1993E-05 ± 1.7021E-06
	(36Ar/37Ar)Ca				2.7556E-04 ± 2.1719E-06
	(36Cl/38Cl)Cl				263 ± 2
	Decay Constants
	40K λε				5.757E-11 ± 0.016E-11					Renne et al., (2011)
	40K λβ				4.9548E-10 ± 0.0134E-10					Renne et al., (2011)
	39Ar				2.58E-3 ± 2.87E-05 a-1					Stoenner et al. (1965)
	37Ar				7.24E0 ± 1.66E-02 a-1					Renne & Norman (2001)
	36Cl λβ				(2.305)E-6 a-1					Endt (1998)

## Sheet: MT-17-07 Standard Data
	Standards: GA1550					Lab #: 1210					Age3: 99.738 ± 0.104 Ma										Heating: 5 s
	Irradiation coordinates: H1
		Power				40Ar*	±σ	39Ar	±σ	38Ar	±σ	37Ar	±σ	36Ar	±σ	D1	±σ	%40Ar*	40Ar*/39ArK	±σ	Ca/K	±σ	Δt	Blank	40Ar	±σ	39Ar	±σ	38Ar	±σ	37Ar	±σ	36Ar	±σ
		(W)				(cps)	(cps)	(cps)	(cps)	(cps)	(cps)	(cps)	(cps)	(cps)	(cps)								(days)	Type2	(cps)	(cps)	(cps)	(cps)	(cps)	(cps)	(cps)	(cps)	(cps)	(cps)
	1210-02	0.6				204797	805.338	9715.04	21.8398	53.8408	2.38957	32.2687	6.64886	101.728	2.66461	1.00565	0.0015243	87	21.0804	0.0954857	0.0062	0.0024	61	LR	8053.92	16.7353	205.862	1.00173	8.81146	0.470061	284.472	1.19889	36.9546	1.06069
	1210-03	0.6				308447	1004.85	14581.2	28.4916	82.9134	3.3537	43.9219	5.94974	137.775	3.30763	1.00525	0.0015147	88	21.1537	0.0803593	0.006	0.001	61	LR	7960.38	17.0312	206.305	1.17431	8.67856	0.51223	284.417	1.12489	36.4834	1.18512
	1210-04	0.6				140329	747.651	6674.98	17.3081	31.2864	2.05375	46.6173	6.34224	61.6369	2.48477	1.00484	0.001505	88	21.0232	0.124569	0.013	0.0033	61	LR	7838.14	18.6735	207.186	1.24133	8.54134	0.533049	284.308	1.05454	35.8887	1.18214
	1210-05	0.6				286533	1201.31	13572.7	28.5204	104.549	2.87321	135.586	6.37829	297.597	3.94924	1.00444	0.0014953	76	21.1109	0.0990032	0.0186	0.0016	61	LR	7808.1	16.8977	207.635	1.11027	8.53591	0.480615	284.253	1.0619	35.7591	1.02627
	1210-06	0.6				394819	811.555	18742.2	35.4746	91.4913	3.89435	134.072	6.17104	128.711	2.6217	1.00404	0.0014856	91	21.0658	0.0588627	0.0133	0.0011	61	LR	7778.1	15.9326	208.084	1.02271	8.53049	0.449974	284.198	1.09799	35.6296	1.11391
	1210-07	0.6				349597	1218.34	16603.7	35.7598	105.662	3.21255	85.0701	6.46858	246.652	4.00507	1.00364	0.001476	83	21.0554	0.0862592	0.0095	0.0013	61	LR	7718.69	16.843	208.973	1.01635	8.51975	0.467376	284.089	1.24252	35.5385	1.11515
	1210-08	0.6				330594	830.466	15594	32.4584	75.0072	3.35358	51.5219	6.45014	112.355	2.71223	1.00324	0.0014663	91	21.2001	0.0691621	0.00615	0.00143	61	LR	7688.67	18.5893	209.422	1.09855	8.51433	0.512948	284.035	1.34455	35.5779	0.990304
	1210-09	0.6				257441	740.081	12199	25.3296	63.1238	2.63327	57.7765	7.21449	66.829	2.42538	1.00284	0.0014566	93	21.1034	0.074837	0.0088	0.002	61	LR	7658.69	20.9454	209.871	1.22525	8.50891	0.57642	283.98	1.46071	35.6172	1.09149
	Weighted mean J:					0.0026869 ± 0.0000046 (0.17%)
	Standards: GA1550					Lab #: 1211					Age3: 99.738 ± 0.104 Ma										Heating: 5 s
	Irradiation coordinates: H3
		Power				40Ar*	±σ	39Ar	±σ	38Ar	±σ	37Ar	±σ	36Ar	±σ	D1	±σ	%40Ar*	40Ar*/39ArK	±σ	Ca/K	±σ	Δt	Blank	40Ar	±σ	39Ar	±σ	38Ar	±σ	37Ar	±σ	36Ar	±σ
		(W)				(cps)	(cps)	(cps)	(cps)	(cps)	(cps)	(cps)	(cps)	(cps)	(cps)								(days)	Type2	(cps)	(cps)	(cps)	(cps)	(cps)	(cps)	(cps)	(cps)	(cps)	(cps)
	1211-01	0.6				397734	862.048	18839.8	36.2585	89.8119	3.51612	55.9044	6.61372	110.799	2.76997	1.00257	0.0014417	92	21.1114	0.0611925	0.0055	0.0012	61	LR	7496.74	20.3393	211.419	1.10801	8.55216	0.513979	284	1.31135	35.7149	1.16333
	1211-02	0.6				101506	590.001	4787.16	13.0329	19.336	2.0025	35.5629	6.67146	11.7557	1.96415	1.0027	0.0014365	97	21.2039	0.136096	0.0138	0.0048	61	LR	7485.46	18.9275	211.897	1.0262	8.57025	0.4875	284.03	1.22168	35.7351	1.10067
	1211-03	0.6				357390	1924.69	16876.2	34.0715	170.809	3.53433	136.588	6.26777	563.438	6.35569	1.00284	0.0014313	68	21.1772	0.121799	0.0151	0.0013	61	LR	7474.18	17.8711	212.375	0.959836	8.58833	0.480447	284.06	1.1445	35.7553	1.05526
	1211-04	0.6				135972	725.384	6481.49	16.8243	42.3475	2.32843	33.8004	6.30289	81.874	2.4103	1.00297	0.0014261	85	20.9785	0.124461	0.0097	0.0034	61	LR	7451.86	17.0587	213.322	0.886397	8.62412	0.524655	284.118	1.03852	35.7952	1.0241
	1211-05	0.6				167177	669.002	7855.81	20.3877	36.8287	2.35757	24.985	6.25799	53.6258	2.21413	1.0031	0.0014209	91	21.2807	0.101501	0.0059	0.0028	61	LR	7440.51	17.3591	213.803	0.883558	8.64231	0.572182	284.148	1.01355	35.8156	1.04
	1211-06	0.6				218367	999.905	10343.5	24.0315	80.676	2.90344	57.5647	6.26034	184.614	3.30508	1.00323	0.0014157	80	21.1115	0.108402	0.01035	0.00209	61	LR	7429.24	18.1146	214.281	0.904619	8.66039	0.631566	284.177	1.01029	35.8357	1.07615
	1211-07	0.6				205782	857.084	9799.99	21.9547	55.4878	2.59828	84.943	6.38384	67.0878	2.83581	1.00336	0.0014105	91	20.9982	0.0993064	0.0161	0.0023	61	LR	7406.9	20.7352	215.228	1.00927	8.69401	0.633763	284.236	1.06683	35.8757	1.19958
	1211-08	0.6				228113	663.922	10950.3	25.2884	56.2439	2.69903	74.6241	5.97712	52.9711	2.18511	1.00349	0.0014053	94	20.8316	0.077398	0.0127	0.0019	61	LR	7394.6	22.663	215.75	1.09551	8.71128	0.569763	284.268	1.12996	35.8978	1.2911
	1211-09	0.6				202053	828.048	9642.17	21.7646	47.1926	2.47237	33.3755	6.14622	47.5645	2.73739	1.00362	0.0014001	93	20.9551	0.0980425	0.0064	0.0022	61	LR	7383.33	24.6463	216.227	1.18776	8.7271	0.523049	284.298	1.20414	35.9179	1.38615
	Weighted mean J:					0.0026935 ± 0.0000050 (0.18%)
	Standards: GA1550					Lab #: 1212					Age3: 99.738 ± 0.104 Ma										Heating: 5 s
	Irradiation coordinates: H5
		Power				40Ar*	±σ	39Ar	±σ	38Ar	±σ	37Ar	±σ	36Ar	±σ	D1	±σ	%40Ar*	40Ar*/39ArK	±σ	Ca/K	±σ	Δt	Blank	40Ar	±σ	39Ar	±σ	38Ar	±σ	37Ar	±σ	36Ar	±σ
		(W)				(cps)	(cps)	(cps)	(cps)	(cps)	(cps)	(cps)	(cps)	(cps)	(cps)								(days)	Type2	(cps)	(cps)	(cps)	(cps)	(cps)	(cps)	(cps)	(cps)	(cps)	(cps)
	1212-01	0.6				280848	932.014	13332	28.8234	70.4201	3.11239	45.5532	5.96705	98.3943	3.0731	1.00372	0.0013922	91	21.0657	0.0834342	0.0064	0.0015	61	LR	7341.55	17.3694	217.686	0.889126	8.78748	0.500081	283.561	0.994349	36.0927	1.2587
	1212-02	0.6				99358.7	686.483	4751.4	14.6453	27.3617	1.55401	23.7457	5.82836	39.0632	2.28868	1.00368	0.0013896	89	20.9115	0.158206	0.0093	0.0042	61	LR	7355.16	15.2108	218.031	0.90308	8.80331	0.537446	283.278	0.924356	36.1488	1.19643
	1212-03	0.6				157442	794.462	7413.72	16.6246	39.5974	2.44925	19.7697	5.75864	63.6682	2.63393	1.00363	0.0013869	89	21.2365	0.117266	0.005	0.0027	61	LR	7368.79	16.6687	218.376	1.01599	8.81917	0.588535	282.995	0.886853	36.2051	1.15232
	1212-04	0.6				188362	717.541	8866.52	21.8483	49.0308	2.66141	32.6259	5.82739	76.9356	2.36748	1.00359	0.0013843	89	21.2442	0.0963824	0.0068	0.0023	61	LR	7403.87	16.7311	218.834	1.07475	8.99847	0.567331	282.434	0.921079	36.3163	1.1264
	1212-05	0.6				253963	949.961	12051.2	24.5523	67.5094	2.33733	41.79	5.96424	114.45	3.13369	1.00355	0.0013817	88	21.0737	0.0897615	0.0064	0.0017	61	LR	7425.86	15.2047	218.951	0.972491	9.16593	0.506847	282.15	0.989711	36.3728	1.14585
	1212-06	0.6				454154	1296.87	21599.3	37.6164	134.493	3.87285	80.5738	6.16929	274.065	4.22379	1.00351	0.001379	85	21.0263	0.0703278	0.0069	0.001	61	LR	7447.72	17.3007	219.066	0.905756	9.33236	0.480157	281.867	1.08462	36.4289	1.1859
	1212-07	0.6				124248	818.457	5879.89	16.2295	34.9494	2.13185	27.7925	5.96416	83.6673	2.72735	1.00347	0.0013764	83	21.1311	0.150922	0.0088	0.0035	61	LR	7491.55	19.3089	219.296	0.903193	9.66237	0.539463	281.346	0.988247	36.5401	1.31811
	1212-08	0.6				239690	784.029	11336.3	23.0877	46.7913	2.4256	71.7316	5.77191	65.7875	2.58782	1.00343	0.0013737	92	21.1436	0.0814708	0.0118	0.0018	61	LR	7513.94	21.0942	219.412	0.967805	9.82904	0.615225	281.104	0.884625	36.5963	1.40652
	1212-10	0.6				67060.1	502.377	3114.03	10.6243	13.1779	1.48939	1.81053	7.0592	9.79211	1.67356	1.00288	0.0012709	96	21.5348	0.17727	0.0011	0.0078	77	LR	4860.1	14.6496	164.058	0.775432	5.37116	0.425008	203.75	0.88041	23.2443	0.88041
	Weighted mean J:					0.0026854 ± 0.0000051 (0.19%)
	Explanations
	D1: Mass discrimination per AMU based on power law (Renne et al., 2009)
	Blank Type2: Ave = average; LR = linear regression versus time
	Age3: Standard Age of Renne et al., (2011)
	Δt = Time interval (days) between end of irradiation and analysis
	N.D. = negative values indiacte that the values is indistinguishable from the background
	Constants Used									Reference
	Atmospheric argon ratios
	(40Ar/36Ar)A					298.56 ± 0.31				Lee et al., (2006)
	Interfering isotope production ratios
	Derived from co-irradiated Fe-doped kalsilite and from CaF2
	(40Ar/39Ar)K					4.7053E-05 ± 1.7377E-05
	(38Ar/39Ar)K					1.1846E-02 ± 5.4865E-05
	(37Ar/39Ar)K					9.8938E-04 ± 8.1820E-05
	(39Ar/37Ar)Ca					6.6527E-04 ± 2.6791E-05
	(38Ar/37Ar)Ca					2.1993E-05 ± 1.7021E-06
	(36Ar/37Ar)Ca					2.7556E-04 ± 2.1719E-06
	(36Cl/38Cl)Cl					263 ± 2
	Decay Constants
	40K λε					5.757E-11 ± 0.016E-11				Renne et al., (2011)
	40K λβ					4.9548E-10 ± 0.0134E-10				Renne et al., (2011)
	39Ar					2.58E-3 ± 2.87E-05 a-1				Stoenner et al. (1965)
	37Ar					7.24E0 ± 1.66E-02 a-1				Renne & Norman (2001)
	36Cl λβ					(2.305)E-6 a-1				Endt (1998)

## Sheet: MT-17-07
	Sample: MT-17-07		Lab #: 1213					J: 0.0026886 ± 0.0000028 (0.10%)
	Material: Muscovite
	Irradiation coordinates: H7																											Blank Corrections												Inverse Isochron
	Run ID	Power	40Ar*	± σ	40Ar	± σ	39Ar	± σ	38Ar	± σ	37Ar	± σ	36Ar	± σ	D1	± σ	%40Ar*	40Ar*/39ArK	±σ	Age	±1σ	1σ (-J)	±2σ	2σ (-J)	Ca/K	± σ	Δt	Blank	40Ar	± σ	39Ar	± σ	38Ar	± σ	37Ar	± σ	36Ar	± σ		39Ar/40Ar	± σ	36Ar/40Ar	± σ
		(watts)	(cps)	(cps)	(cps)	(cps)	(cps)	(cps)	(cps)	(cps)	(cps)	(cps)	(cps)	(cps)						(Ma)	(Ma)	(Ma)	(Ma)	(Ma)			(days)	Type2	(cps)	(cps)	(cps)	(cps)	(cps)	(cps)	(cps)	(cps)	(cps)	(cps)
	1213-01A	0.5	43678.4	536.544	48735	47.5338	371.927	4.2554	2.81566	0.910639	33.221	8.30499	16.9367	1.78995	1.0051	0.0012233	89.6242	117.438	1.97144	496.154	7.29816	7.28395	14.5963	14.5679	0.166138	0.0122838	85	LR	6858.64	15.312	168.751	0.944217	5.86037	0.430442	199.196	0.886122	28.7416	1.17511		0.00763161	8.76337e-05	0.000347527	3.67298e-05
	1213-01B	0.8	239733	641.436	245467	130.809	1731.15	7.10744	3.85859	1.03846	81.1053	7.6946	19.2047	2.10319	1.00553	0.001219	97.6641	138.482	0.678636	572.282	2.45851	2.40401	4.91701	4.80802	0.0871422	0.00114211	85	LR	6832.76	14.5251	168.547	0.814265	5.88595	0.436804	199.091	0.831627	28.5075	0.993112		0.00705246	2.91976e-05	7.82374e-05	8.56821e-06
	1213-01C	0.9	142613	496.824	145521	101.461	1302.01	7.468	1.25734	1.13351	64.4702	8.51304	9.73945	1.62897	1.00596	0.0012146	98.0018	109.533	0.735052	466.707	2.79396	2.76042	5.58792	5.52084	0.0920992	0.00213412	85	LR	6806.92	17.1537	168.344	0.877211	5.91148	0.491127	198.987	0.794967	28.2737	1.04394		0.00894726	5.16968e-05	6.69282e-05	1.11941e-05
	1213-01D	0.9	76286	550.056	77556.2	54.0028	779.283	5.39596	0.708492	0.890131	24.5564	8.01888	4.25448	1.83346	1.00639	0.0012102	98.3622	97.8925	0.978611	422.456	3.78682	3.76613	7.57365	7.53227	0.0586113	0.00665585	85	LR	6754.47	17.7567	168.102	0.899476	6.10244	0.497947	198.78	0.783381	27.9505	1.11201		0.010048	6.99257e-05	5.48567e-05	2.36404e-05
	1213-01E	1	126206	469.714	126529	80.3746	1290.28	7.46262	-0.688594	1.10645	52.5755	8.18291	1.0821	1.55006	1.00682	0.0012058	99.7447	97.8127	0.672732	422.149	2.61938	2.58941	5.23875	5.17882	0.0757902	0.00227431	85	LR	6712.98	14.8011	168.044	0.82694	6.36019	0.422529	198.62	0.830749	27.8111	0.915141		0.0101975	5.93344e-05	8.55222e-06	1.22507e-05
	1213-01F	1.1	85685.2	538.892	85999.6	67.9859	878.259	6.11554	-0.471202	0.98501	49.7146	8.37229	1.05324	1.79055	1.00725	0.0012014	99.6344	97.5625	0.91543	421.186	3.54744	3.52546	7.09488	7.05092	0.105287	0.00371917	85	LR	6685.79	16.312	168.005	0.96526	6.5291	0.422155	198.516	0.884889	27.7198	0.88261		0.0102124	7.1568e-05	1.2247e-05	2.08204e-05
	1213-01G	1.2	72102.3	518.653	72601.9	57.0998	736.609	4.79667	-0.57702	1.02342	53.1241	7.88876	1.67332	1.72662	1.00724	0.0011812	99.3119	97.8841	0.949765	422.424	3.6765	3.65519	7.353	7.31037	0.134143	0.00383154	85	LR	6622.69	15.3424	167.329	0.871032	7.07333	0.469961	198.029	0.871032	27.4203	1.06154		0.0101459	6.65482e-05	2.30479e-05	2.37821e-05
	1213-01H	1.3	95343	528.156	95327.3	100.03	975.967	6.69058	-2.14492	1.09604	44.1298	8.5083	-0.0526536	1.73699	1.00679	0.0011652	100.016	97.6908	0.861021	421.68	3.33843	3.31502	6.67686	6.63004	0.0841027	0.00370286	85	LR	6609.51	14.3204	167.449	0.777821	7.15652	0.400427	197.826	0.777821	27.3702	0.949025		0.0102381	7.10028e-05	-5.52346e-07	-1.82214e-05
	1213-01I	1.4	78264.4	482.177	78227.5	49.9489	799.732	4.80149	-2.95816	0.823627	21.9976	8.31333	-0.123643	1.60632	1.00635	0.0011493	100.047	97.8633	0.841868	422.344	3.2641	3.24008	6.5282	6.48017	0.0511615	0.00761424	85	LR	6596.29	13.8163	167.57	0.869358	7.23987	0.424751	197.623	0.869358	27.3199	0.87455		0.0102232	6.17246e-05	-1.58056e-06	-2.0534e-05
	1213-01J	1.6	170180	513.579	170781	97.0902	1743.35	8.33302	-1.95203	1.01736	91.7583	8.53304	2.01214	1.68917	1.0059	0.0011334	99.6482	97.6166	0.551813	421.394	2.16117	2.12487	4.32234	4.24974	0.0978979	0.00131456	85	LR	6570.2	14.5085	167.275	0.859754	7.17149	0.426876	197.093	0.934533	27.2206	0.873989		0.0102081	4.91375e-05	1.1782e-05	9.89086e-06
	1213-01K	1.8	151238	500.315	151588	97.265	1547.37	6.89685	-0.740503	1.09668	49.9654	7.72205	1.17059	1.64379	1.00546	0.0011175	99.7694	97.7387	0.542513	421.864	2.12551	2.08851	4.25102	4.17703	0.0600602	0.00170224	85	LR	6557	15.6359	166.85	0.717715	7.01669	0.403738	196.759	0.830574	27.1704	0.947855		0.0102078	4.59664e-05	7.72218e-06	1.08438e-05
	1213-01L	2	152576	565.931	154153	85.7363	1452.15	8.23461	-0.469986	1.0185	95.4221	8.59947	5.28245	1.87365	1.00501	0.0011016	98.9769	105.069	0.711949	449.866	2.73084	2.69868	5.46169	5.39735	0.122223	0.00168573	85	LR	6543.79	17.1671	166.425	0.742284	6.86169	0.475812	196.424	0.817677	27.1202	1.06023		0.00942017	5.36748e-05	3.42676e-05	1.21545e-05
	Plateau Age:			421.9 ± 2.0 Ma (2SD)
	Sample: MT-17-07		Lab #: 1213					J: 0.0026886 ± 0.0000028 (0.10%)
	Material: Muscovite
	Irradiation coordinates: H7																											Blank Corrections												Inverse Isochron
	Run ID	Power	40Ar*	± σ	40Ar	± σ	39Ar	± σ	38Ar	± σ	37Ar	± σ	36Ar	± σ	D1	± σ	%40Ar*	40Ar*/39ArK	±σ	Age	±1σ	1σ (-J)	±2σ	2σ (-J)	Ca/K	± σ	Δt	Blank	40Ar	± σ	39Ar	± σ	38Ar	± σ	37Ar	± σ	36Ar	± σ		39Ar/40Ar	± σ	36Ar/40Ar	± σ
		(watts)	(cps)	(cps)	(cps)	(cps)	(cps)	(cps)	(cps)	(cps)	(cps)	(cps)	(cps)	(cps)						(Ma)	(Ma)	(Ma)	(Ma)	(Ma)			(days)	Type2	(cps)	(cps)	(cps)	(cps)	(cps)	(cps)	(cps)	(cps)	(cps)	(cps)
	1213-02A	0.5	13327.6	469.822	16036.9	30.1303	181.3	3.37334	3.40893	0.85852	24.6234	7.8912	9.07435	1.57036	1.00539	0.0013201	83.1062	73.5114	2.93022	326.105	11.8981	11.894	23.7963	23.788	0.252617	0.0306453	86	LR	7023.06	15.2262	169.143	0.973999	5.6025	0.464163	197.954	0.849553	32.6379	0.959865		0.0113052	0.000211419	0.000565843	9.79276e-05
	1213-02B	0.8	93058.9	548.516	95398	53.8916	960.792	5.16421	4.84947	0.944506	42.4846	8.4708	7.83467	1.8283	1.0053	0.0013272	97.548	96.8565	0.772625	418.465	3.00565	2.97998	6.0113	5.95995	0.082246	0.00371172	86	LR	6967.45	14.1529	169.388	0.870465	5.42699	0.400087	197.618	0.886027	32.1333	0.976912		0.0100714	5.44315e-05	8.21261e-05	1.9165e-05
	1213-02C	0.9	54621.5	521.057	54767.8	46.0329	558.274	4.36405	0.876029	0.893626	35.5694	8.91489	0.489843	1.73841	1.00521	0.0013343	99.733	97.8401	1.20668	422.255	4.66113	4.64435	9.32226	9.2887	0.118507	0.00837063	86	LR	6911.85	16.4325	169.632	0.801967	5.25149	0.430644	197.281	1.01216	31.6286	1.10026		0.0101935	8.01421e-05	8.944e-06	3.17415e-05
	1213-02D	1	82057.4	521.904	82645.3	56.5102	852.979	4.92827	1.20618	0.930091	57.0977	8.92062	1.96924	1.73779	1.00512	0.0013414	99.2886	96.201	0.826627	415.935	3.21644	3.19272	6.43288	6.38544	0.124507	0.00375847	86	LR	6812.03	16.6554	170.117	0.801032	5.21755	0.430628	197.007	1.01224	31.0582	1.10019		0.010321	6.00477e-05	2.38277e-05	2.10271e-05
	1213-02E	1	55354.2	494.942	56414.7	49.29	569.285	4.4772	1.1547	0.884319	42.2323	8.42845	3.55214	1.64952	1.00503	0.0013485	98.1201	97.2345	1.15787	419.922	4.47953	4.46224	8.95906	8.92447	0.137984	0.00658102	86	LR	6766.79	14.8494	170.362	0.868851	5.36239	0.392493	197.071	0.87202	30.991	0.961672		0.0100911	7.98505e-05	6.29649e-05	2.92392e-05
	1213-02F	1.1	88280.5	538.571	90115.8	54.5806	891.709	5.74344	1.57277	1.01003	49.0279	7.76904	6.14743	1.7946	1.00494	0.0013556	97.9633	99.0014	0.878293	426.719	3.39561	3.3721	6.79122	6.74421	0.102266	0.00322661	86	LR	6721.68	16.5843	170.606	0.971671	5.50683	0.447803	197.135	0.811689	30.9239	0.920049		0.00989514	6.40151e-05	6.8217e-05	1.99144e-05
	1213-02G	1.1	74583.5	510.877	75036.9	56.2215	761.839	5.1885	0.458616	0.874473	35.5155	8.39212	1.51863	1.70074	1.00507	0.0013346	99.3958	97.8992	0.945636	422.482	3.66059	3.63918	7.32118	7.27836	0.0867096	0.00543199	86	LR	6651.24	15.6478	171.577	0.778766	6.39989	0.458985	197.394	0.982011	30.469	1.15722		0.0101529	6.95632e-05	2.02385e-05	2.26654e-05
	1213-02H	1.2	314020	665.711	323489	200.431	3180.63	20.5541	6.00632	1.30929	90.3131	8.50897	31.7172	2.12602	1.00529	0.0013065	97.0727	98.7288	0.671467	425.672	2.61003	2.57951	5.22007	5.15902	0.0528142	0.000810116	86	LR	6616.39	13.1366	171.845	0.812084	6.63139	0.374589	197.479	0.887486	30.1924	1.0337		0.00983226	6.38301e-05	9.80471e-05	6.57244e-06
	1213-02I	1.2	481320	609.342	486643	280.334	4940.8	30.8438	-0.0969761	1.63282	116.604	9.28467	17.828	1.81203	1.00551	0.0012784	98.9062	97.4173	0.620523	420.627	2.42269	2.39047	4.84537	4.78093	0.0438963	0.000552344	86	LR	6581.5	13.6833	172.112	0.92771	6.86319	0.374939	197.565	0.82794	29.9155	0.941214		0.0101528	6.365e-05	3.66347e-05	3.72359e-06
	1213-02J	1.4	2695.71	483.601	2478.05	24.5593	20.7024	2.76273	-0.33513	0.634254	-9.46015	8.4515	-0.729046	1.61769	1.00573	0.0012502	108.784	130.212	29.114	542.746	104.834	104.832	209.667	209.665	-0.849944	-0.791787	86	LR	6512.45	12.7341	172.202	0.881184	6.83905	0.348916	197.774	0.866465	29.239	0.900849		0.00835433	0.00111795	-0.000294202	-0.000652814
	1213-02K	2	9688	495.668	8686.42	25.9795	85.903	3.02837	-2.08534	0.707513	-22.4049	8.75411	-3.35468	1.65791	1.00595	0.0012221	111.53	112.778	7.0072	478.855	26.1424	26.1387	52.2849	52.2774	-0.485119	-0.0911623	86	LR	6488.87	12.0804	172.079	0.794693	6.66228	0.339805	197.859	0.951678	28.9631	0.965782		0.00988934	0.000349884	-0.000386198	-0.000190866
	1213-02L	3	40685.2	471.119	40359.5	43.2335	417.149	3.8395	-0.819384	0.867906	12.3246	9.1813	-1.09097	1.57131	1.00617	0.001194	100.807	97.5316	1.44269	421.067	5.57034	5.55638	11.1407	11.1128	0.0549534	0.0310028	86	LR	6465.25	13.7163	171.955	0.782852	6.48526	0.393519	197.945	1.06552	28.6867	1.06869		0.0103358	9.57747e-05	-2.70313e-05	-3.89329e-05
	Plateau Age:			421.7 ± 2.2 (2SD)
	Explanations
	D1: Mass discrimination per AMU based on power law (Renne et al., 2009)
	Blank Type2: Ave = average; LR = linear regression versus time
	Δt = Time interval (days) between end of irradiation and analysis
	N.D. = negative values indiacte that the values is indistinguishable from the background
	Constants Used									Reference
	Atmospheric argon ratios
	(40Ar/36Ar)Air				298.56 ± 0.31					Lee et al., (2006)
	Interfering isotope production ratios
	Derived from co-irradiated Fe-doped kalsilite and from CaF2
	(40Ar/39Ar)K				4.7053E-05 ± 1.7377E-05
	(38Ar/39Ar)K				1.1846E-02 ± 5.4865E-05
	(37Ar/39Ar)K				9.8938E-04 ± 8.1820E-05
	(39Ar/37Ar)Ca				6.6527E-04 ± 2.6791E-05
	(38Ar/37Ar)Ca				2.1993E-05 ± 1.7021E-06
	(36Ar/37Ar)Ca				2.7556E-04 ± 2.1719E-06
	(36Cl/38Cl)Cl				263 ± 2
	Decay Constants
	40K λε				5.757E-11 ± 0.016E-11					Renne et al., (2011)
	40K λβ				4.9548E-10 ± 0.0134E-10					Renne et al., (2011)
	39Ar				2.58E-3 a-1					Stoenner et al. (1965)
	37Ar				7.21E0 a-1					Stoenner et al. (1965)
	36Cl λβ				(2.305)E-6 a-1					Endt (1998)

## Sheet: MT-17-08 Standard Data
	Standards: GA1550					Lab #: 1188					Age3: 99.738 ± 0.104 Ma										Heating: 5 s
	Irradiation coordinates: C1
		Power				40Ar*	±σ	39Ar	±σ	38Ar	±σ	37Ar	±σ	36Ar	±σ	D1	±σ	%40Ar*	40Ar*/39ArK	±σ	Ca/K	±σ	Δt	Blank	40Ar	±σ	39Ar	±σ	38Ar	±σ	37Ar	±σ	36Ar	±σ
		(W)				(cps)	(cps)	(cps)	(cps)	(cps)	(cps)	(cps)	(cps)	(cps)	(cps)								(days)	Type2	(cps)	(cps)	(cps)	(cps)	(cps)	(cps)	(cps)	(cps)	(cps)	(cps)
	1188-01	0.6				183985	657.186	8529.08	19.4615	41.8788	2.4339	18.2549	5.19597	32.3949	2.18017	1.0018	0.0012905	95	21.5715	0.0914321	0.004	0.0021	56	LR	4744.93	13.664	182.075	0.951639	4.99527	0.501078	260.545	0.919465	23.5147	1.02357
	1188-02	0.6				195277	649.64	9077.77	19.9545	46.2916	2.06141	29.9535	5.12682	69.8036	2.1428	1.00182	0.0013073	90	21.5116	0.0857751	0.0061	0.002	56	LR	4726.23	13.272	182.215	0.848538	5.02005	0.46879	260.495	0.876378	23.1949	0.884941
	1188-03	0.6				418136	819.933	19442.3	33.8726	97.2465	3.49706	114.801	5.10519	104.086	2.6607	1.00185	0.0013241	93	21.5066	0.0564133	0.011	0.001	56	LR	4707.55	14.5009	182.356	0.947836	5.0448	0.453408	260.446	0.849297	22.8754	0.956117
	1188-04	0.6				165013	625.06	7663.92	17.4074	36.6257	2.4172	24.6816	5.08587	35.3207	2.0694	1.00187	0.0013409	94	21.5311	0.0950974	0.006	0.0023	56	LR	4683.11	14.3445	182.526	0.955705	5.09383	0.477438	260.348	0.847934	22.5961	0.971362
	1188-05	0.6				204451	832	9568.39	19.1245	52.555	2.45942	81.4163	5.68072	116.011	2.75912	1.00189	0.0013577	86	21.3673	0.0968749	0.0158	0.0021	56	LR	4676.7	15.6442	182.56	0.84866	5.12084	0.518579	260.293	0.876897	22.6407	0.924583
	1188-07	0.6				82998.9	751.984	3854.49	12.299	28.0552	1.80775	27.4262	5.68839	62.4771	2.50777	1.00194	0.0013913	82	21.5331	0.206838	0.0132	0.0051	56	LR	4664.88	20.6972	182.658	1.02287	5.31429	0.507802	260.145	1.04447	22.9202	1.11028
	1188-08	0.6				454696	1090.35	21334.3	36.6447	114.617	3.66451	85.0851	6.09544	241.671	3.55306	1.00196	0.0014081	86	21.3129	0.0628662	0.00742	0.00099	56	LR	4664.81	18.738	182.694	0.922181	5.46114	0.481738	260.096	1.12241	23.122	0.989965
	1188-09	0.6				276585	1102.46	12890.7	26.4504	81.5938	2.92777	56.4728	6.00282	168.653	3.63812	1.00198	0.0014249	85	21.4561	0.0961901	0.0081	0.0016	56	LR	4664.73	21.2395	182.73	0.928753	5.60809	0.568867	260.046	1.20807	23.324	1.10539
	Weighted mean J:					0.0026429 ± 0.0000046 (0.17%)
	Standards: GA1550					Lab #: 1189					Age3: 99.738 ± 0.104 Ma										Heating: 5 s
	Irradiation coordinates: C3
		Power				40Ar*	±σ	39Ar	±σ	38Ar	±σ	37Ar	±σ	36Ar	±σ	D1	±σ	%40Ar*	40Ar*/39ArK	±σ	Ca/K	±σ	Δt	Blank	40Ar	±σ	39Ar	±σ	38Ar	±σ	37Ar	±σ	36Ar	±σ
		(W)				(cps)	(cps)	(cps)	(cps)	(cps)	(cps)	(cps)	(cps)	(cps)	(cps)								(days)	Type2	(cps)	(cps)	(cps)	(cps)	(cps)	(cps)	(cps)	(cps)	(cps)	(cps)
	1189-01	0.6				466093	860.43	21798.7	39.4371	105.533	3.97045	53.7132	5.23051	93.4269	2.7745	1.00202	0.0014356	94	21.3818	0.0552665	0.0046	0.0008	56	LR	4676.71	20.7073	182.755	1.08269	5.884	0.618926	259.929	0.920357	24.1877	1.4141
	1189-03	0.6				189483	673.05	8848.97	21.1914	39.8251	2.46017	44.8877	5.80136	39.1168	2.2333	1.00204	0.0014233	94	21.413	0.0917315	0.0094	0.0023	56	LR	4685.58	18.4636	182.606	0.8205	5.97873	0.563126	259.879	1.09644	24.3298	1.11712
	1189-04	0.6				377984	953.991	17629.4	33.3008	96.9616	3.6758	84.7527	5.48041	154.177	3.12654	1.00206	0.0014172	89	21.4406	0.067591	0.0089	0.0011	56	LR	4694.36	19.105	182.581	0.950286	6.07256	0.537389	259.885	1.05144	24.4706	1.0093
	1189-05	0.6				436981	874.022	20451.4	38.853	112.287	3.83941	131.424	6.17035	139.527	2.84527	1.00207	0.0014111	91	21.3668	0.0589418	0.012	0.001	56	LR	4698.8	20.4755	182.631	0.912658	6.11997	0.537103	259.916	0.988752	24.5417	1.04779
	1189-06	0.6				184604	773.097	8604.07	20.8982	55.6164	2.55419	70.1081	5.67076	93.3825	2.5551	1.00208	0.001405	87	21.4554	0.103871	0.01516	0.00228	56	LR	4703.24	22.3995	182.681	0.878353	6.16739	0.545507	259.947	1.1504	24.6128	1.14367
	1189-07	0.6				357026	951.266	16645	32.0462	95.1332	3.47491	86.9969	5.92909	141.405	3.11752	1.0021	0.0013988	89	21.4495	0.0705093	0.0097	0.0012	56	LR	4706.87	23.6601	182.786	0.8195	6.26585	0.588654	260.357	1.27263	24.5944	1.04745
	1189-09	0.6				137851	725.226	6421.88	15.7931	38.4795	2.07488	44.3456	5.68728	61.7905	2.40965	1.00212	0.0013866	88	21.4659	0.12466	0.0128	0.0031	56	LR	4704.2	21.0422	182.891	0.780206	6.36493	0.660826	261.162	1.02389	24.3878	1.08754
	Weighted mean J:					0.0026486 ± 0.0000044 (0.17%)
	Standards: GA1550					Lab #: 1190					Age3: 99.738 ± 0.104 Ma										Heating: 5 s
	Irradiation coordinates: C5
		Power				40Ar*	±σ	39Ar	±σ	38Ar	±σ	37Ar	±σ	36Ar	±σ	D1	±σ	%40Ar*	40Ar*/39ArK	±σ	Ca/K	±σ	Δt	Blank	40Ar	±σ	39Ar	±σ	38Ar	±σ	37Ar	±σ	36Ar	±σ
		(W)				(cps)	(cps)	(cps)	(cps)	(cps)	(cps)	(cps)	(cps)	(cps)	(cps)								(days)	Type2	(cps)	(cps)	(cps)	(cps)	(cps)	(cps)	(cps)	(cps)	(cps)	(cps)
		0.6				242879	983.627	11268.9	24.4724	77.9181	2.74538	58.196	5.60555	206.26	3.25811	1.00218	0.0013646	80	21.553	0.0990446	0.0096	0.0017	56	LR	4699.34	17.547	183.083	0.769024	6.50943	0.735305	262.318	1.11005	24.2805	1.1558
		0.6				184009	700.595	8446.82	18.868	38.2026	2.38649	12.0481	5.63608	61.2349	2.32098	1.00223	0.0013487	91	21.7844	0.0961623	0.0027	0.0023	56	LR	4698.07	17.0078	183.133	0.779508	6.52006	0.684108	262.388	0.989962	24.2807	1.08822
		0.6				305796	1336.18	14292.7	25.5424	126.243	3.26171	45.8935	5.35798	363.921	4.42677	1.00227	0.0013328	74	21.3953	0.101004	0.006	0.0013	56	LR	4696.79	16.6609	183.183	0.795314	6.5307	0.638597	262.457	1.10577	24.2809	1.03651
		0.6				159846	751.796	7367.81	17.9065	47.7275	2.53557	43.4469	5.93275	103.874	2.4962	1.00232	0.0013169	84	21.6952	0.114856	0.011	0.0028	56	LR	4694.27	16.5836	183.283	0.840989	6.55176	0.570614	262.44	1.26771	24.2813	0.990167
		0.6				294688	1020.06	13692	26.0688	81.7804	3.3964	56.513	5.95249	150.446	3.38019	1.00237	0.001301	87	21.5226	0.0850264	0.0077	0.0015	56	LR	4692.99	16.8554	183.333	0.870603	6.56241	0.550182	262.352	1.15551	24.2815	0.997696
		0.6				373404	908.19	17489.9	31.4691	89.5721	3.4635	39.1137	5.54756	110.825	2.97179	1.00241	0.0012851	92	21.3498	0.0645912	0.0042	0.0011	56	LR	4691.71	17.3255	183.384	0.904044	6.57306	0.540687	262.264	1.07374	24.2817	1.02583
		0.6				69467.7	698.02	3241.77	10.1458	18.8921	1.90839	24.7494	5.4635	34.7756	2.32902	1.00246	0.0012692	87	21.4289	0.225524	0.0142	0.0058	57	LR	4689.18	18.7753	183.483	0.979896	6.59412	0.555695	262.089	1.02779	24.282	1.13512
		0.6				92975.7	688.655	4317.2	12.3242	29.1967	1.83301	11.2391	5.29492	57.9292	2.29518	1.00251	0.0012533	84	21.5361	0.170952	0.0048	0.0042	57	LR	4687.91	19.733	183.534	1.02244	6.60478	0.579494	262.001	1.06821	24.2822	1.21265
		0.6				202521	851.649	9477.76	22.3858	52.2814	2.47973	50.4044	5.94785	122.751	2.8249	1.00255	0.0012374	85	21.368	0.103061	0.0099	0.0022	57	LR	4686.63	20.814	183.584	1.06733	6.61542	0.612666	261.913	1.1469	24.2824	1.30168
	Weighted mean J:					0.0026383 ± 0.0000050 (0.19%)
	Explanations
	D1: Mass discrimination per AMU based on power law (Renne et al., 2009)
	Blank Type2: Ave = average; LR = linear regression versus time
	Age3: Standard Age of Renne et al., (2011)
	Δt = Time interval (days) between end of irradiation and analysis
	N.D. = negative values indicate that the value is indistinguishable from the background
	Constants Used									Reference
	Atmospheric argon ratios
	(40Ar/36Ar)A					298.56 ± 0.31				Lee et al., (2006)
	Interfering isotope production ratios
	Derived from co-irradiated Fe-doped kalsilite and from CaF2
	(40Ar/39Ar)K					4.7053E-05 ± 1.7377E-05
	(38Ar/39Ar)K					1.1846E-02 ± 5.4865E-05
	(37Ar/39Ar)K					9.8938E-04 ± 8.1820E-05
	(39Ar/37Ar)Ca					6.6527E-04 ± 2.6791E-05
	(38Ar/37Ar)Ca					2.1993E-05 ± 1.7021E-06
	(36Ar/37Ar)Ca					2.7556E-04 ± 2.1719E-06
	(36Cl/38Cl)Cl					263 ± 2
	Decay Constants
	40K λε					5.757E-11 ± 0.016E-11				Renne et al., (2011)
	40K λβ					4.9548E-10 ± 0.0134E-10				Renne et al., (2011)
	39Ar					2.58E-3 ± 2.87E-05 a-1				Stoenner et al. (1965)
	37Ar					7.24E0 ± 1.66E-02 a-1				Renne & Norman (2001)
	36Cl λβ					(2.305)E-6 a-1				Endt (1998)

## Sheet: MT-17-08
	Sample: MT-17-08		Lab #: 1191					J: 0.0026433 ± 0.0000027 (0.10%)
	Material: Muscovite
	Irradiation coordinates: C7																											Blank Corrections												Inverse Isochron
	Run ID	Power	40Ar*	± σ	40Ar	± σ	39Ar	± σ	38Ar	± σ	37Ar	± σ	36Ar	± σ	D1	± σ	%40Ar*	40Ar*/39ArK	±σ	Age	±1σ	1σ (-J)	±2σ	2σ (-J)	Ca/K	± σ	Δt	Blank	40Ar	± σ	39Ar	± σ	38Ar	± σ	37Ar	± σ	36Ar	± σ		39Ar/40Ar	1SD	36Ar/40Ar	1SD
		(watts)	(cps)	(cps)	(cps)	(cps)	(cps)	(cps)	(cps)	(cps)	(cps)	(cps)	(cps)	(cps)						(Ma)	(Ma)		(Ma)				(days)	Type2	(cps)	(cps)	(cps)	(cps)	(cps)	(cps)	(cps)	(cps)	(cps)	(cps)
	1191-02A	0.5	9107.89	548.373	10062.8	39.6363	110.229	2.5684	1.70145	0.846321	10.9373	7.84838	3.19838	1.83192	1.00474	0.001401	90.5105	82.6268	5.33438	357.189	20.9278	20.9252	41.8556	41.8505	0.184555	0.0993316	76	LR	5118.74	25.9043	168.469	0.862748	5.64921	0.44469	211.09	1.07357	25.0876	1.12797		0.0109541	0.000258858	0.000317842	0.000182053
	1191-02B	0.7	28744.3	573.312	34914.8	52.4032	287.793	3.92341	3.62582	0.882068	-0.491178	7.5314	20.6674	1.9121	1.0042	0.001372	82.3271	99.8786	2.41298	423.627	9.13197	9.12395	18.2639	18.2479	-0.00317448	-0.746398	76	LR	5116.07	23.1752	168.564	0.809533	5.70412	0.411635	210.788	0.966554	25.1508	0.981847		0.00824272	0.00011305	0.000591938	5.47719e-05
	1191-02C	0.8	265762	519.186	266322	161.212	2459.26	8.96412	-0.751823	1.19274	9.85472	7.59966	1.87627	1.65301	1.00312	0.001312	99.7897	108.066	0.446912	454.322	1.71051	1.66142	3.42101	3.32284	0.00745338	0.0044597	76	LR	5110.74	19.7301	168.754	0.781238	5.81381	0.404359	210.184	0.851723	25.277	0.839984		0.00923416	3.41199e-05	7.04512e-06	6.20681e-06
	1191-02D	0.9	165555	564.43	173867	102.192	1551	8.04394	3.77544	1.0927	10.804	7.31534	27.842	1.85904	1.00366	0.001342	95.2191	106.741	0.662492	449.39	2.50223	2.46957	5.00446	4.93914	0.0129565	0.00600718	76	LR	5113.41	21.0533	168.659	0.78149	5.75897	0.39755	210.486	0.889927	25.2139	0.880499		0.00892058	4.6561e-05	0.000160133	1.06927e-05
	1191-02E	1	454045	721.567	465403	290.646	4260.78	12.3328	4.62731	1.59592	37.5375	7.60434	38.0426	2.21174	1.00258	0.001282	97.5595	106.564	0.351881	448.731	1.37251	1.31219	2.74502	2.62437	0.0163866	0.000719915	76	LR	5008.07	19.3699	170.849	0.808803	5.86866	0.431073	209.883	0.857095	30.3401	0.868856		0.00915502	2.71089e-05	8.1741e-05	4.75258e-06
	1191-02F	1	386790	560.777	387056	230.87	3624.17	10.2219	0.0752266	1.31792	29.2245	6.59038	0.890524	1.71171	1.00204	0.001252	99.9313	106.725	0.338458	449.332	1.32448	1.26171	2.64896	2.52342	0.0149986	0.000805047	76	LR	5105.41	20.0225	169.944	0.861387	5.92339	0.474238	209.582	0.905128	25.4031	0.960637		0.00936342	2.69936e-05	2.30076e-06	4.42238e-06
	1191-02G	1.1	516404	571.05	521086	290.632	4851.5	13.4893	1.51098	1.68742	27.1082	7.33566	15.6804	1.64636	1.00202	0.001248	99.1016	106.442	0.318504	448.276	1.25421	1.18802	2.50843	2.37604	0.0103929	0.00078995	76	LR	5298.96	19.1629	160.244	0.841983	5.80408	0.400706	208.608	1.03364	20.9239	0.837405		0.00931038	2.64027e-05	3.00917e-05	3.15952e-06
	1191-02H	1.1	33565.8	497.597	33330.8	39.8717	313.775	4.17951	-0.632942	0.763427	11.868	5.97697	-0.787227	1.6613	1.00254	0.001274	100.705	106.974	2.13195	450.259	7.95372	7.94347	15.9074	15.8869	0.0703514	0.0187805	76	LR	5101.19	19.0985	169.259	1.09692	5.63956	0.405561	208.223	0.810873	24.4116	0.863022		0.00941398	0.000125899	-2.36186e-05	-4.98427e-05
	1191-02I	1.2	56421.6	441.334	55888	46.2363	521.32	4.37317	-1.28794	0.777613	-9.28109	6.83262	-1.78744	1.47007	1.00306	0.001299	100.955	108.228	1.24135	454.927	4.63117	4.61323	9.26235	9.22646	-0.0331137	-0.0182245	76	LR	5102.06	19.3337	169.209	0.946174	5.57559	0.443674	208.073	0.847355	24.2124	0.948281		0.00932795	7.86284e-05	-3.19826e-05	-2.6304e-05
	1191-02J	1.5	62385.5	488.208	62797.2	50.4132	585.167	4.96104	0.591725	0.95092	0.670493	7.13198	1.37877	1.62647	1.00358	0.001325	99.3445	106.612	1.23005	448.908	4.6041	4.58647	9.20821	9.17294	0.00213122	0.241152	76	LR	5102.93	20.6273	169.158	0.882379	5.51145	0.496633	207.923	0.950004	24.0127	1.06367		0.00931836	7.93544e-05	2.19559e-05	2.59003e-05
	Plateau Age:			449.0 ± 1.4 Ma (2SD)
	Sample: MT-17-08		Lab #: 1191					J: 0.0026433 ± 0.0000027 (0.10%)
	Material: Muscovite
	Irradiation coordinates: C7																											Blank Corrections												Inverse Isochron
	Run ID	Power	40Ar*	± σ	40Ar	± σ	39Ar	± σ	38Ar	± σ	37Ar	± σ	36Ar	± σ	D1	± σ	%40Ar*	40Ar*/39ArK	±σ	Age	±1σ	1σ (-J)	±2σ	2σ (-J)	Ca/K	± σ	Δt	Blank	40Ar	± σ	39Ar	± σ	38Ar	± σ	37Ar	± σ	36Ar	± σ		39Ar/40Ar	1SD	36Ar/40Ar	1SD
		(watts)	(cps)	(cps)	(cps)	(cps)	(cps)	(cps)	(cps)	(cps)	(cps)	(cps)	(cps)	(cps)						(Ma)	(Ma)		(Ma)				(days)	Type2	(cps)	(cps)	(cps)	(cps)	(cps)	(cps)	(cps)	(cps)	(cps)	(cps)
	1191-03A	0.5	5821.32	453.224	6936.42	24.0348	66.419	2.52928	2.59551	0.773519	4.94322	14.3292	3.73496	1.51589	1.0029	0.0012748	83.9239	87.6453	7.59622	376.769	29.4789	29.4769	58.9578	58.9537	0.13843	1.16847	79	LR	5023.05	13.3293	165.811	0.7656	4.32154	0.453908	202.849	0.821617	22.6456	0.897358		0.00957539	0.000366144	0.000538456	0.000218549
	1191-03B	0.8	26837.8	463.907	29347.6	35.3175	280.311	3.50789	1.77213	0.843265	-15.4386	12.7996	8.40619	1.54928	1.0027	0.0012751	91.4482	95.743	2.04316	407.922	7.80175	7.79298	15.6035	15.586	-0.102442	-0.0716958	79	LR	5019.38	12.5828	165.891	0.734361	4.39506	0.427696	203.096	0.740067	22.7771	0.810912		0.00955142	0.00012008	0.000286435	5.27918e-05
	1191-03C	0.9	44376	527.862	46361.4	43.7187	410.726	4.40483	1.70242	0.826904	7.83614	14.3054	6.6501	1.76194	1.00249	0.0012754	95.7174	108.043	1.73041	454.237	6.44603	6.43318	12.8921	12.8664	0.0354865	0.118646	79	LR	5015.72	12.1377	165.969	0.723295	4.46847	0.411533	203.343	0.809886	22.9085	0.890153		0.00885921	9.53772e-05	0.00014344	3.80046e-05
	1191-03D	0.9	110249	476.789	114533	66.1444	1032.84	5.81829	2.49018	1.00839	14.2342	7.10483	14.3465	1.58145	1.00229	0.0012758	96.2602	106.744	0.75808	449.401	2.85447	2.82588	5.70893	5.65176	0.0256338	0.00653077	79	LR	5008.46	12.2505	166.126	0.762747	4.61405	0.413006	203.363	0.809496	22.8057	0.872097		0.00901786	5.10665e-05	0.000125261	1.3808e-05
	1191-03E	1	292411	514.987	294991	180.455	2747.59	9.71248	0.79086	1.20264	18.4062	7.02423	8.64002	1.61552	1.00209	0.0012761	99.1255	106.425	0.420308	448.211	1.61853	1.5678	3.23705	3.13561	0.0124602	0.0018587	79	LR	5004.79	12.801	166.205	0.810623	4.68752	0.430554	203.132	0.780402	22.5668	0.777825		0.00931416	3.34141e-05	2.92891e-05	5.47653e-06
	1191-03F	1	107810	500.603	108146	70.3346	1014.1	5.82662	0.219063	0.947221	7.21157	7.07597	1.12355	1.66009	1.00188	0.0012764	99.6898	106.311	0.785357	447.788	2.95758	2.93017	5.91515	5.86034	0.013227	0.0128103	79	LR	5001.13	13.6367	166.284	0.87352	4.76093	0.457907	202.901	0.933083	22.3282	0.868849		0.00937717	5.42216e-05	1.03892e-05	1.53505e-05
	1191-03G	1	83609.8	476.93	83689.3	56.0956	787.559	6.3588	2.03149	0.873745	13.865	7.32228	0.266198	1.58635	1.0022	0.0012747	99.905	106.163	1.04951	447.236	3.93742	3.91692	7.87483	7.83383	0.0327453	0.00939719	79	LR	4987.83	15.1894	166.606	0.880015	5.03132	0.448192	202.575	0.882186	22.4571	1.01633		0.00941051	7.62424e-05	3.18079e-06	1.89552e-05
	1191-03H	1	71226.4	496.79	71927	46.1772	665.512	6.82379	-0.187528	0.879768	16.2468	7.13907	2.34672	1.65675	1.00271	0.0012726	99.0259	107.025	1.3272	450.449	4.96097	4.94451	9.92195	9.88903	0.0454071	0.00923305	79	LR	4984.5	14.0119	166.714	0.81361	5.10189	0.385953	202.541	0.943778	22.1386	0.852158		0.0092526	9.50568e-05	3.26264e-05	2.30338e-05
	1191-03I	1.1	141673	457.76	143387	77.2213	1330.94	6.70839	2.10085	1.18872	18.9158	7.65282	5.73951	1.51124	1.00323	0.0012705	98.8049	106.446	0.637301	448.291	2.41088	2.37711	4.82176	4.75423	0.0264349	0.00446011	79	LR	4981.16	13.6794	166.823	0.940224	5.17256	0.414917	202.506	1.09312	21.8197	0.886144		0.00928215	4.70516e-05	4.00281e-05	1.05396e-05
	1191-03J	1.1	88412.3	456.835	89502.9	58.1316	825.688	5.31216	0.0389481	0.949419	13.4966	7.79571	3.653	1.51769	1.00375	0.0012684	98.7814	107.077	0.883567	450.643	3.31609	3.29139	6.63218	6.58279	0.0304033	0.010339	79	LR	4974.57	15.5974	167.123	0.942563	5.22229	0.419646	202.98	1.02214	21.7074	0.892013		0.00922526	5.96535e-05	4.08143e-05	1.69569e-05
	1191-03K	1.2	222349	491.926	222325	141.1	2079.91	9.2568	-1.10718	1.18895	28.0761	7.71202	-0.0798343	1.57843	1.00427	0.0012663	100.011	106.903	0.531326	449.996	2.02065	1.97996	4.04129	3.95993	0.0251077	0.00200613	79	LR	4971.24	17.5842	167.319	0.785278	5.20102	0.391989	203.5	0.855753	21.9178	0.847839		0.00935524	4.20575e-05	-3.59088e-07	-7.09964e-06
	1191-03L	1.2	207853	493.876	208573	121.697	1983.39	8.36465	0.224684	1.07784	25.931	7.81883	2.40984	1.60318	1.00479	0.0012642	99.655	104.797	0.507284	442.129	1.93972	1.89861	3.87943	3.79722	0.0243177	0.00231346	79	LR	4967.59	20.2533	167.533	0.809933	5.17776	0.463063	204.069	0.889151	22.1479	1.01727		0.00950935	4.04862e-05	1.15539e-05	7.68644e-06
	Plateau Age:			449.0 ± 1.8 Ma (2SD)
	Explanations
	D1: Mass discrimination per AMU based on power law (Renne et al., 2009)
	Blank Type2: Ave = average; LR = linear regression versus time
	Δt = Time interval (days) between end of irradiation and analysis
	N.D. = negative values indicate that the value is indistinguishable from the background
	Constants Used									Reference
	Atmospheric argon ratios
	(40Ar/36Ar)Air				298.56 ± 0.31					Lee et al., (2006)
	Interfering isotope production ratios
	Derived from co-irradiated Fe-doped kalsilite and from CaF2
	(40Ar/39Ar)K				4.7053E-05 ± 1.7377E-05
	(38Ar/39Ar)K				1.1846E-02 ± 5.4865E-05
	(37Ar/39Ar)K				9.8938E-04 ± 8.1820E-05
	(39Ar/37Ar)Ca				6.6527E-04 ± 2.6791E-05
	(38Ar/37Ar)Ca				2.1993E-05 ± 1.7021E-06
	(36Ar/37Ar)Ca				2.7556E-04 ± 2.1719E-06
	(36Cl/38Cl)Cl				263 ± 2
	Decay Constants
	40K λε				5.757E-11 ± 0.016E-11					Renne et al., (2011)
	40K λβ				4.9548E-10 ± 0.0134E-10					Renne et al., (2011)
	39Ar				2.58E-3 ± 2.87E-05 a-1					Stoenner et al. (1965)
	37Ar				7.24E0 ± 1.66E-02 a-1					Renne & Norman (2001)
	36Cl λβ				(2.305)E-6 a-1					Endt (1998)

## Sheet: NT-18-04 Standard Data
	Standards: GA1550					Lab #: 1196					Age3: 99.738 ± 0.104 Ma										Heating: 5 s
	Irradiation coordinates: E1
		Power				40Ar*	±σ	39Ar	±σ	38Ar	±σ	37Ar	±σ	36Ar	±σ	D1	±σ	%40Ar*	40Ar*/39ArK	±σ	Ca/K	±σ	Δt	Blank	40Ar	±σ	39Ar	±σ	38Ar	±σ	37Ar	±σ	36Ar	±σ
		(W)				(cps)	(cps)	(cps)	(cps)	(cps)	(cps)	(cps)	(cps)	(cps)	(cps)								(days)	Type2	(cps)	(cps)	(cps)	(cps)	(cps)	(cps)	(cps)	(cps)	(cps)	(cps)
	1196-01	0.6				226519	789.993	10541.5	23.0084	50.2136	2.20129	42.3808	5.76728	49.3429	2.60845	1.00303	0.0012231	94	21.4884	0.0884082	0.0075	0.0019	58	LR	5725.66	21.4134	184.435	0.818446	6.30701	0.550062	257.566	1.21846	31.3014	1.32103
	1196-02	0.6				209474	1319.3	9877.73	20.0692	95.4715	2.66116	77.748	5.89157	313.847	4.37368	1.00302	0.0012199	69	21.2067	0.140341	0.0146	0.0021	58	LR	5702.03	19.0922	184.259	0.829238	6.20367	0.471156	257.519	1.15991	31.2333	1.0716
	1196-03	0.6				114205	664.673	5355.48	12.8416	30.0112	1.82115	28.011	5.77933	33.9575	2.20945	1.00301	0.0012167	92	21.325	0.134232	0.01	0.004	58	LR	5678.4	21.3161	184.083	0.931296	6.10039	0.50327	257.473	1.10698	31.1652	1.06273
	1196-04	0.6				107279	626.447	4971.62	13.4968	25.8701	1.83297	39.5757	5.35892	24.0048	2.08296	1.00301	0.0012135	94	21.5782	0.138956	0.0148	0.0037	58	LR	5632.06	24.3816	183.999	0.996072	5.96486	0.557583	257.38	1.02182	30.7415	1.15457
	1196-05	0.6				209501	702.777	9843.94	19.9919	37.7051	2.54458	15.4953	5.29705	57.0453	2.29771	1.003	0.0012103	92	21.2823	0.0834562	0.0029	0.0019	58	LR	5608.93	21.9183	184.093	0.905376	5.93221	0.494733	257.334	0.990586	30.3787	1.03918
	1196-06	0.6				269352	832.308	12563.7	25.9488	69.5854	3.06827	37.402	5.78714	95.0159	2.75098	1.003	0.0012071	90	21.4389	0.0796829	0.0055	0.0016	58	LR	5583.72	19.5689	184.196	0.830212	5.89663	0.444539	257.283	0.966772	29.9833	0.965451
	1196-07	0.6				199818	755.359	9307.26	21.2516	49.774	2.53056	30.8786	4.72305	70.9133	2.47087	1.00299	0.001204	90	21.4691	0.0948141	0.0062	0.0018	58	LR	5537.68	16.6457	184.384	0.77825	5.83164	0.422613	257.19	0.953116	29.2612	1.00341
	1196-08	0.6				332980	942.496	15654.9	28.2118	74.2758	3.11866	49.7695	5.51413	122.945	3.10193	1.00298	0.0012008	90	21.27	0.071371	0.00591	0.00122	58	LR	5514.58	16.0968	184.478	0.799417	5.79903	0.449149	257.143	0.961233	28.8989	1.10099
	1196-09	0.6				481122	998.672	22513.8	34.7945	112.152	4.20561	80.2809	5.5542	191.424	3.2319	1.00298	0.0011976	89	21.3701	0.0553032	0.0066	0.0009	58	LR	5491.47	16.2675	184.572	0.850218	5.7664	0.496726	257.096	0.979137	28.5363	1.23691
	Weighted mean J:					0.0026532 ± 0.0000045 (0.17%)
	Standards: GA1550					Lab #: 1198					Age3: 99.738 ± 0.104 Ma										Heating: 5 s
	Irradiation coordinates: E3
		Power				40Ar*	±σ	39Ar	±σ	38Ar	±σ	37Ar	±σ	36Ar	±σ	D1	±σ	%40Ar*	40Ar*/39ArK	±σ	Ca/K	±σ	Δt	Blank	40Ar	±σ	39Ar	±σ	38Ar	±σ	37Ar	±σ	36Ar	±σ
		(W)				(cps)	(cps)	(cps)	(cps)	(cps)	(cps)	(cps)	(cps)	(cps)	(cps)								(days)	Type2	(cps)	(cps)	(cps)	(cps)	(cps)	(cps)	(cps)	(cps)	(cps)	(cps)
	1198-01	0.6				450333	1237.6	20997.6	34.5899	116.181	3.99502	35.1628	5.57652	279.664	4.05579	1.00274	0.0011851	84	21.4469	0.0687179	0.0031	0.0009	58	LR	5420.97	15.9388	184.87	1.01455	6.40132	0.53288	256.923	1.12078	26.4203	1.18214
	1198-02	0.6				299097	915.822	14070.6	28.3773	78.8949	2.5371	63.156	5.69463	156.323	3.00939	1.0025	0.0011757	87	21.2569	0.0779375	0.0083	0.0014	58	LR	5413.58	14.4965	184.911	0.93896	6.44452	0.480818	256.876	1.17539	27.0945	1.02629
	1198-03	0.6				112062	617.805	5212.1	12.618	28.7684	2.01607	4.76409	5.5892	34.6257	2.05709	1.00226	0.0011664	92	21.5004	0.129458	0.0017	0.0037	58	LR	5406.2	16.5042	184.952	0.878184	6.4877	0.543276	256.83	1.23534	27.7683	1.11377
	1198-04	0.6				163119	667.211	7589.5	17.423	37.0301	2.1406	16.0204	4.87649	25.5898	2.21779	1.00202	0.001157	96	21.4927	0.100812	0.0039	0.0022	58	LR	5384.82	16.5075	185.034	0.813652	6.56034	0.545684	257.026	1.02357	27.5272	1.10285
	1198-05	0.6				35421.5	511.553	1649.56	7.0231	12.0573	1.30439	1.75998	5.10146	11.8237	1.70796	1.00178	0.0011477	91	21.4733	0.323309	0.002	0.0107	58	LR	5370.51	14.1663	185.075	0.813825	6.59041	0.480953	256.276	0.884915	26.591	0.955574
	1198-06	0.6				106950	627.696	5027.52	12.443	22.1074	1.91126	9.29762	4.72629	21.01	2.0914	1.00154	0.0011383	94	21.2729	0.135499	0.00344	0.00325	58	LR	5356.23	15.1746	185.116	0.836512	6.62042	0.530827	257.524	0.956117	25.6567	1.03508
	1198-07	0.6				68706.5	651.618	3234.73	10.702	19.0068	1.61321	17.6808	5.25605	27.5407	2.17299	1.00131	0.001129	89	21.2403	0.21335	0.0102	0.0056	58	LR	5316.35	16.3461	185.198	0.939954	6.49085	0.532861	257.686	0.96802	24.8994	1.02353
	1198-08	0.6				128539	717.031	5832.47	13.7119	20.6099	2.09454	9.36807	4.65079	21.3259	2.38338	1.00107	0.0011196	95	22.0385	0.13341	0.003	0.0028	58	LR	5290.24	18.5575	185.239	1.01568	6.32817	0.480812	257.598	0.921169	25.0798	0.885005
	Weighted mean J:					0.0026449 ± 0.0000055 (0.21%)
	Standards: GA1550					Lab #: 1200					Age3: 99.738 ± 0.104 Ma										Heating: 5 s
	Irradiation coordinates: E5
		Power				40Ar*	±σ	39Ar	±σ	38Ar	±σ	37Ar	±σ	36Ar	±σ	D1	±σ	%40Ar*	40Ar*/39ArK	±σ	Ca/K	±σ	Δt	Blank	40Ar	±σ	39Ar	±σ	38Ar	±σ	37Ar	±σ	36Ar	±σ
		(W)				(cps)	(cps)	(cps)	(cps)	(cps)	(cps)	(cps)	(cps)	(cps)	(cps)								(days)	Type2	(cps)	(cps)	(cps)	(cps)	(cps)	(cps)	(cps)	(cps)	(cps)	(cps)
	1200-01	0.6				128393	646.391	6027.91	15.559	30.7145	2.10422	20.8135	5.38783	40.7876	2.14976	1.00114	0.001111	91	21.2998	0.120505	0.0064	0.0031	58	LR	5330.01	19.5379	186.313	0.849556	5.47587	0.496371	258.293	1.03073	25.3887	0.967888
	1200-02	0.6				139432	704.47	6558.24	14.9791	41.4562	2.10551	13.7118	4.91865	86.2593	2.34117	1.0017	0.001121	84	21.2605	0.117884	0.0039	0.0026	58	LR	5360.94	16.3366	186.678	0.886132	5.6195	0.459938	258.562	0.919247	25.4383	0.92138
	1200-04	0.6				59251.8	592.695	2809.36	9.90851	19.2905	1.52177	37.5628	5.43939	32.3669	1.97489	1.0028	0.0011411	86	21.0909	0.223702	0.0249	0.0067	58	LR	5443.54	16.8144	188.041	0.951728	5.80876	0.534222	259.274	1.03893	25.8959	1.11035
	1200-05	0.6				318389	734.599	14993.3	24.9619	81.7632	2.82372	109.504	5.56189	82.2014	2.38337	1.00335	0.0011512	93	21.2353	0.0604187	0.0136	0.0013	58	LR	5464.76	15.5629	188.687	0.848549	5.70958	0.457113	259.454	0.954776	26.2611	0.989974
	1200-06	0.6				322273	668.025	15185.1	29.0346	66.4121	3.11589	68.9369	5.84431	56.6035	2.16219	1.0039	0.0011612	95	21.2229	0.0598495	0.0084	0.0013	58	LR	5486.23	18.0292	189.34	0.948586	5.60924	0.488021	259.636	1.09902	26.6305	1.10668
	1200-07	0.6				428946	905.828	20102.3	34.3729	108.168	4.07868	47.5218	6.30282	118.433	2.93132	1.00446	0.0011713	92	21.3381	0.0579803	0.0044	0.0011	58	LR	5539.82	18.5699	190.655	0.951704	5.69558	0.518393	260.105	1.19216	27.072	1.11032
	1200-08	0.6				307708	849.284	14559.4	24.9224	72.4251	2.91823	139.106	6.0909	108.244	2.79077	1.00501	0.0011813	90	21.1347	0.0686406	0.0178	0.0014	58	LR	5572.93	17.7198	191.339	0.848539	5.88499	0.461362	260.401	1.06987	27.1504	0.989963
	1200-09	0.6				266103	775.891	12500.7	23.4124	63.1141	3.26984	24.9313	5.81706	89.6257	2.55346	1.00556	0.0011914	91	21.287	0.073769	0.0037	0.0016	58	LR	5606.01	21.0235	192.023	0.947642	6.07427	0.455227	260.696	1.06988	27.2289	1.10558
	Weighted mean J:					0.0026689 ± 0.0000044 (0.16%)
	Explanations
	D1: Mass discrimination per AMU based on power law (Renne et al., 2009)
	Blank Type2: Ave = average; LR = linear regression versus time
	Age3: Standard Age of Renne et al., (2011)
	Δt = Time interval (days) between end of irradiation and analysis
	N.D. = Negative values mean value is indistinguishable from the background
	Constants Used									Reference
	Atmospheric argon ratios
	(40Ar/36Ar)A					298.56 ± 0.31				Lee et al., (2006)
	Interfering isotope production ratios
	Derived from co-irradiated Fe-doped kalsilite and from CaF2
	(40Ar/39Ar)K					4.7053E-05 ± 1.7377E-05
	(38Ar/39Ar)K					1.1846E-02 ± 5.4865E-05
	(37Ar/39Ar)K					9.8938E-04 ± 8.1820E-05
	(39Ar/37Ar)Ca					6.6527E-04 ± 2.6791E-05
	(38Ar/37Ar)Ca					2.1993E-05 ± 1.7021E-06
	(36Ar/37Ar)Ca					2.7556E-04 ± 2.1719E-06
	(36Cl/38Cl)Cl					263 ± 2
	Decay Constants
	40K λε					5.757E-11 ± 0.016E-11				Renne et al., (2011)
	40K λβ					4.9548E-10 ± 0.0134E-10				Renne et al., (2011)
	39Ar					2.58E-3 ± 2.87E-05 a-1				Stoenner et al. (1965)
	37Ar					7.24E0 ± 1.66E-02 a-1				Renne & Norman (2001)
	36Cl λβ					(2.305)E-6 a-1				Endt (1998)

## Sheet: NT-18-04
	Sample: NT-18-04		Lab #: 1201-01					J: 0.0026557 ± 0.0000028 (0.10%)
	Material: Muscovite
	Irradiation coordinates: E7																											Blank Corrections												Inverse Isochron
	Run ID	Power	40Ar*	± σ	40Ar	± σ	39Ar	± σ	38Ar	± σ	37Ar	± σ	36Ar	± σ	D1	± σ	%40Ar*	40Ar*/39ArK	±σ	Age	±1σ	±1σ (-J)	±2σ	±2σ (-J)	Ca/K	± σ	Δt	Blank	40Ar	± σ	39Ar	± σ	38Ar	± σ	37Ar	± σ	36Ar	± σ		39Ar/40Ar	1SD	36Ar/40Ar	1SD
		(watts)	(cps)	(cps)	(cps)	(cps)	(cps)	(cps)	(cps)	(cps)	(cps)	(cps)	(cps)	(cps)						(Ma)	(Ma)	(Ma)	(Ma)	(Ma)			(days)	Type2	(cps)	(cps)	(cps)	(cps)	(cps)	(cps)	(cps)	(cps)	(cps)	(cps)
	1201-01A	0.5	5274.13	555.382	8252.54	28.3376	70.0381	2.88809	1.87063	0.855453	9.8833	6.87911	9.97591	1.85775	1.00259	0.0012	63.91	75.3	8.51603	329.64	34.08	34.08	68.16	68.16	0.26	0.14	72	LR	5528.35	15.0671	169.84	0.996284	5.6838	0.452321	212.006	0.951606	23.4367	1.06237		0.00848686	0.000351175	0.00120883	0.000225151
	1201-01B	0.7	14292.4	516.393	16236.2	32.871	148.39	3.0539	2.25879	0.814812	15.7425	5.93483	6.51052	1.72609	1.00263	0.00121	88.03	96.32	4.00491	411.83	15.32	15.31	30.64	30.63	0.2	0.03	72	LR	5483.49	13.4352	169.705	0.908962	5.69232	0.40678	211.97	0.848536	23.4355	0.978148		0.00913948	0.000189	0.000400988	0.000106314
	1201-01C	0.8	12914.6	483.174	16045.5	35.3441	146.281	2.7488	1.88779	0.828008	19.3882	6.87601	10.4867	1.61398	1.00267	0.00122	80.49	88.29	3.69628	380.86	14.38	14.38	28.77	28.76	0.25	0.04	72	LR	5438.76	15.0069	169.57	0.846519	5.70082	0.379734	211.934	0.947804	23.4342	0.926095		0.00911662	0.000172485	0.000653561	0.000100598
	1201-01D	0.9	11175.8	484.266	12890.5	29.5735	126.404	3.31661	0.198835	0.773376	6.27595	6.71395	5.74341	1.61897	1.00271	0.00123	86.7	88.41	4.47869	381.36	17.42	17.42	34.84	34.83	0.09	0.11	72	LR	5385.34	17.2797	169.304	0.815768	5.71766	0.392948	211.974	1.012	23.4318	0.935126		0.00980597	0.000258271	0.000445552	0.000125598
	1201-01E	1	18113.4	544.54	20796.5	33.133	188.303	3.52393	2.34062	0.769024	10.2803	7.05783	8.9865	1.82049	1.00275	0.00124	87.1	96.19	3.40637	411.36	13.03	13.03	26.07	26.06	0.1	0.05	72	LR	5376.53	16.0249	169.169	0.850633	5.72616	0.431288	212.05	0.872086	23.4306	0.995312		0.00905456	0.000170062	0.000432117	8.7541e-05
	1201-01F	1	9975.63	467.435	10814.8	27.6778	103.154	2.95835	-2.04937	0.761206	-5.30717	6.92772	2.81063	1.56288	1.00279	0.00125	92.24	96.71	5.31279	413.32	20.3	20.3	40.6	40.6	-0.1	-0.17	72	LR	5367.72	15.3967	169.035	0.915356	5.73465	0.485094	212.126	0.811697	23.4294	1.08579		0.00953826	0.000274634	0.000259888	0.000144515
	1201-01G	1.1	18047.4	508.681	21293.5	35.4566	178.133	3.49277	1.38212	0.768145	-0.296135	6.38157	10.8727	1.6996	1.00294	0.00126	84.76	101.31	3.47863	430.84	13.17	13.16	26.34	26.33	0	-1.44	72	LR	5334.93	18.8989	168.707	1.08459	5.94276	0.443663	212.155	0.880207	23.9302	0.926918		0.0083656	0.00016462	0.000510611	7.98222e-05
	1201-01H	1.2	231600	539.778	239648	121.825	2403.04	9.56702	2.11456	1.3868	25.4674	6.22169	26.9561	1.76107	1.00305	0.00125	96.64	96.38	0.444616	412.07	1.74	1.7	3.49	3.4	0.02	0	72	LR	5326.12	21.0086	168.749	0.981365	6.01607	0.420896	211.97	0.813575	24.1146	0.871425		0.0100274	4.02453e-05	0.000112482	7.34879e-06
	1201-01I	1.2	404334	680.904	417861	251.093	4216.27	11.3544	6.17969	1.40084	21.0982	7.24107	45.3072	2.11937	1.00315	0.00124	96.76	95.9	0.30459	410.23	1.23	1.17	2.46	2.33	0.01	0	72	LR	5317.31	23.4031	168.791	0.897645	6.08947	0.409558	211.785	0.940047	24.2992	0.848856		0.0100901	2.78408e-05	0.000108426	5.07237e-06
	1201-01J	1.3	407594	505.984	409641	220.927	4258.62	12.2569	-1.27108	1.40508	22.6142	6.42529	6.85783	1.52465	1.00326	0.00124	99.5	95.71	0.3	409.51	1.21	1.15	2.42	2.3	0.01	0	72	LR	5310.25	20.2136	168.875	0.812593	6.23482	0.423659	211.465	1.01218	24.6648	0.907799		0.010396	3.04419e-05	1.67411e-05	3.72193e-06
	1201-01K	1.4	292692	548.367	292868	180.748	3047.68	10.7459	-2.87593	1.30726	9.40242	5.70682	0.589423	1.73406	1.00337	0.00123	99.94	96.04	0.383457	410.77	1.52	1.47	3.03	2.93	0.01	0	72	LR	5312.03	16.4268	168.917	0.818995	6.30832	0.448113	211.328	0.872166	24.8496	0.98374		0.0104063	3.72499e-05	2.01259e-06	5.92098e-06
	1201-01L	1.5	227982	526.354	227606	121.107	2362.66	8.48499	-0.780668	1.22112	9.50845	6.23478	-1.26037	1.71567	1.00348	0.00123	100.17	96.49	0.411971	412.51	1.62	1.57	3.24	3.15	0.01	0	72	LR	5313.82	16.3392	168.959	0.85904	6.38208	0.482265	211.19	0.811651	25.0351	1.08329		0.0103805	3.76863e-05	-5.53749e-06	-7.53792e-06
	Plateau Age:			410.7 ± 1.2 Ma (2SD)
	Sample: NT-18-04		Lab #: 1201-01					J: 0.0026557 ± 0.0000028 (0.10%)
	Material: Muscovite
	Irradiation coordinates: E7																											Blank Corrections												Inverse Isochron
	Run ID	Power	40Ar*	± σ	40Ar	± σ	39Ar	± σ	38Ar	± σ	37Ar	± σ	36Ar	± σ	D1	± σ	%40Ar*	40Ar*/39ArK	±σ	Age	±1σ	±1σ (-J)	±2σ	±2σ (-J)	Ca/K	± σ	Δt	Blank	40Ar	± σ	39Ar	± σ	38Ar	± σ	37Ar	± σ	36Ar	± σ		39Ar/40Ar	1SD	36Ar/40Ar	1SD
		(watts)	(cps)	(cps)	(cps)	(cps)	(cps)	(cps)	(cps)	(cps)	(cps)	(cps)	(cps)	(cps)						(Ma)	(Ma)	(Ma)	(Ma)	(Ma)			(days)	Type2	(cps)	(cps)	(cps)	(cps)	(cps)	(cps)	(cps)	(cps)	(cps)	(cps)
	1201-03B	0.5	4450.3	506.848	5116.74	31.0045	40.1323	2.50568	-0.0246838	0.796883	-3.5248	12.5269	2.2322	1.69446	1.00455	0.0012814	86.9752	110.891	14.4027	466.72	53.4286	53.4269	106.857	106.854	-0.163363	-2.07353	78	LR	5056.35	13.3147	167.09	0.960423	5.22944	0.447494	201.047	0.970858	24.1477	0.899914		0.00784333	0.000492003	0.000436255	0.00033117
	1201-03C	0.8	79156	526.346	85735.9	56.4023	797.197	5.29204	4.73381	0.95193	12.0442	13.2346	22.0387	1.75265	1.00399	0.0012641	92.3254	99.2929	0.932944	423.178	3.56713	3.54512	7.13425	7.09023	0.0281011	0.0341171	78	LR	5026.89	12.4986	167.049	0.863081	5.24865	0.423584	200.963	0.860539	24.1346	0.845018		0.00929829	6.20273e-05	0.000257053	2.04431e-05
	1201-03D	0.9	109335	560.102	125320	78.9545	1131.54	6.14275	11.3654	1.11008	25.0907	11.8294	53.5411	1.85645	1.00344	0.0012467	87.2445	96.6249	0.721223	413.011	2.78311	2.75604	5.56622	5.51209	0.0412435	0.00939153	78	LR	4997.39	12.2398	155.007	0.814449	5.26789	0.450714	200.878	0.847086	24.1213	0.850514		0.00902919	4.93454e-05	0.000427234	1.48161e-05
	1201-03E	1	334299	703.454	348321	220.359	3471.53	10.472	10.5019	1.43023	24.0755	14.2287	46.9649	2.23704	1.00289	0.0012293	95.9744	96.2973	0.354178	411.759	1.40835	1.35437	2.8167	2.70875	0.0128994	0.00454444	78	LR	4967.85	12.5753	156.965	0.823448	5.28716	0.521145	200.793	0.935084	24.1081	0.915551		0.00996647	3.07182e-05	0.000134832	6.42293e-06
	1201-03F	1	171373	560.238	173295	89.9353	1786.21	8.74332	0.392466	1.10136	35.3887	13.3475	6.43621	1.85212	1.00252	0.0012165	98.8911	95.9425	0.564735	410.402	2.1952	2.16117	4.39039	4.32233	0.0368507	0.00542258	78	LR	4878.93	12.9368	155.012	0.865015	5.35535	0.423467	201.294	0.951641	23.9967	1.1838		0.0103073	5.07362e-05	3.71402e-05	1.06877e-05
	1201-03G	1	115165	514.954	114826	76.0196	1198.79	6.23885	-0.0322638	1.01866	53.097	14.1178	-1.13389	1.70589	1.00271	0.0012212	100.295	96.0673	0.659152	410.879	2.5511	2.52182	5.10221	5.04364	0.082383	0.00625288	78	LR	4870.52	12.409	164.176	0.743678	5.34345	0.389025	201.203	0.848539	23.9198	1.07621		0.0104401	5.47707e-05	-9.87482e-06	-1.48563e-05
	1201-03H	1	85660.6	495.445	85835.1	55.9875	890.866	5.68205	-0.290385	0.97864	4.22878	13.3641	0.584391	1.64882	1.00289	0.0012258	99.7967	96.1544	0.827894	411.212	3.19022	3.16682	6.38044	6.33364	0.00882908	0.0882353	78	LR	4862.1	14.7851	164.339	0.798202	5.33153	0.44713	201.113	0.947836	23.8428	0.983351		0.0103788	6.65425e-05	6.8083e-06	1.92092e-05
	1201-03I	1.1	200122	462.736	202349	121.176	2085.98	6.96858	1.04012	1.0957	25.5741	12.7014	7.4589	1.49579	1.00307	0.0012304	98.8995	95.9368	0.389777	410.38	1.54053	1.49164	3.08106	2.98328	0.0228037	0.00570093	78	LR	4846.86	16.8416	164.47	0.866639	5.23208	0.492972	201.189	1.06797	23.6906	0.861488		0.0103088	3.49874e-05	3.68616e-05	7.39216e-06
	1201-03J	1	55172.5	496.03	55189.9	43.2624	574.837	5.12361	1.29177	0.901775	-21.3619	14.2471	0.0583314	1.65508	1.00326	0.001235	99.9684	95.9794	1.21509	410.543	4.66556	4.64964	9.33112	9.29927	-0.0691207	-0.0313614	78	LR	4835.71	13.8071	164.415	0.745361	5.08921	0.416628	201.46	0.907613	23.5676	0.84228		0.0104156	9.31943e-05	1.05692e-06	2.99888e-05
	1201-03K	1.1	137353	530.676	141436	76.0162	1431.17	6.61091	2.0243	1.0587	34.8241	14.1859	13.6758	1.75906	1.00344	0.0012396	97.1131	95.9722	0.577945	410.515	2.24486	2.21158	4.48972	4.42316	0.0452584	0.00771934	78	LR	4828.75	12.388	155.381	0.752326	5	0.413	201.629	0.856738	23.4907	0.869771		0.0101189	4.70567e-05	9.66926e-05	1.24373e-05
	1201-03L	1.1	172148	515.434	173206	85.775	1802.05	7.89911	0.940086	1.11182	0.368472	14.1923	3.544	1.70232	1.00363	0.0012442	99.3891	95.529	0.507106	408.819	1.97986	1.94232	3.95972	3.88465	0.000380321	0.564217	78	LR	4821.79	11.5041	169.348	0.823653	4.91073	0.445657	201.799	0.852836	23.4139	0.924957		0.0104041	4.58953e-05	2.04611e-05	9.82831e-06
	1201-03M	1.1	100534	478.559	101474	64.987	1040.16	5.46368	-0.115187	1.05375	27.7985	13.3474	3.15085	1.58804	1.00381	0.0012489	99.073	96.6523	0.685146	413.116	2.64652	2.61803	5.29304	5.23606	0.0497089	0.0117212	78	LR	4814.82	11.2834	155.314	0.944988	4.82139	0.507706	201.968	0.896617	23.337	1.00333		0.0102505	5.42417e-05	3.10507e-05	1.56497e-05
	Plateau Age:			410.9 ± 1.3 Ma (2SD)
	Explanations
	D1: Mass discrimination per AMU based on power law (Renne et al., 2009)
	Blank Type2: Ave = average; LR = linear regression versus time
	Δt = Time interval (days) between end of irradiation and analysis
	N.D. = Negative values mean value is indistinguishable from the background
	Constants Used									Reference
	Atmospheric argon ratios
	(40Ar/36Ar)Air				298.56 ± 0.31					Lee et al., (2006)
	Interfering isotope production ratios
	Derived from co-irradiated Fe-doped kalsilite and from CaF2
	(40Ar/39Ar)K				4.7053E-05 ± 1.7377E-05
	(38Ar/39Ar)K				1.1846E-02 ± 5.4865E-05
	(37Ar/39Ar)K				9.8938E-04 ± 8.1820E-05
	(39Ar/37Ar)Ca				6.6527E-04 ± 2.6791E-05
	(38Ar/37Ar)Ca				2.1993E-05 ± 1.7021E-06
	(36Ar/37Ar)Ca				2.7556E-04 ± 2.1719E-06
	(36Cl/38Cl)Cl				263 ± 2
	Decay Constants
	40K λε				5.757E-11 ± 0.016E-11					Renne et al., (2011)
	40K λβ				4.9548E-10 ± 0.0134E-10					Renne et al., (2011)
	39Ar				2.58E-3 ± 2.87E-05 a-1					Stoenner et al. (1965)
	37Ar				7.24E0 ± 1.66E-02 a-1					Renne & Norman (2001)
	36Cl λβ				(2.305)E-6 a-1					Endt (1998)

## Sheet: NT-18-05 Standard Data
	Standards: GA1550					Lab #: 1202					Age3: 99.738 ± 0.104 Ma										Heating: 5 s
	Irradiation coordinates: F1
		Power				40Ar*	±σ	39Ar	±σ	38Ar	±σ	37Ar	±σ	36Ar	±σ	D1	±σ	%40Ar*	40Ar*/39ArK	±σ	Ca/K	±σ	Δt	Blank	40Ar	±σ	39Ar	±σ	38Ar	±σ	37Ar	±σ	36Ar	±σ
		(W)				(cps)	(cps)	(cps)	(cps)	(cps)	(cps)	(cps)	(cps)	(cps)	(cps)								(days)	Type2	(cps)	(cps)	(cps)	(cps)	(cps)	(cps)	(cps)	(cps)	(cps)	(cps)
	1202-02	0.6				81151.8	753.182	3841.73	12.2653	19.545	1.60896	38.2923	5.25884	47.1531	2.51102	1.00399	0.0013701	85	21.1238	0.207328	0.0185	0.0047	59	LR	6684.57	20.223	191.155	0.937045	7.43589	0.463176	264.289	1.03682	30.2028	1.09704
	1202-03	0.6				159272	769.143	7485.84	17.3791	52.664	2.4391	88.5035	5.83975	112.286	2.55291	1.00392	0.0013638	83	21.2765	0.114003	0.022	0.003	59	LR	6685.39	24.2513	191.524	0.956922	7.43196	0.511496	264.761	1.1837	30.277	1.05307
	1202-04	0.6				405111	845.259	19195.9	35.4396	114.379	3.72421	205.331	6.2633	119.752	2.7293	1.00384	0.0013575	92	21.1041	0.0587965	0.0199	0.0011	59	LR	6675.4	26.2536	192.254	1.10329	7.39843	0.558924	265.464	1.11831	30.424	1.02439
	1202-05	0.6				362645	983.36	17073.1	31.902	82.8238	3.18761	39.8821	5.75862	135.804	3.21362	1.00376	0.0013512	90	21.2407	0.0699474	0.0043	0.0012	59	LR	6664.36	23.769	192.622	1.21832	7.36819	0.520072	265.7	1.02553	30.4982	1.04102
	1202-06	0.6				344992	1074.18	16304.1	30.3932	99.8039	3.83421	144.889	5.84753	214.44	3.52719	1.00368	0.0013449	84	21.1598	0.0767893	0.0165	0.0012	59	LR	6653.3	21.7177	192.992	1.35235	7.33791	0.485073	265.935	1.17692	30.5726	1.07771
	1202-07	0.6				469864	969.922	22330.1	39.6249	140.92	4.06515	296.116	6.89107	135.514	3.08547	1.0036	0.0013386	92	21.0417	0.0572785	0.0247	0.0011	59	LR	6631.44	19.4663	193.417	1.26959	7.27808	0.431034	266.391	1.27251	30.7195	1.20109
	1202-08	0.6				199608	789.77	9370.07	21.147	53.6351	2.34987	53.6841	5.63614	60.4478	2.60761	1.00352	0.0013323	92	21.3028	0.0970343	0.01066	0.00208	59	LR	6619.4	19.4902	193.48	1.07524	7.24508	0.412138	266.637	1.09059	30.8006	1.29232
	1202-09	0.6				459021	1010.3	21594.1	38.0144	108.054	4.49001	44.2358	5.75994	138.555	3.25694	1.00345	0.001326	92	21.2568	0.0599102	0.0038	0.0009	59	LR	6607.34	20.4402	193.542	0.984884	7.21209	0.402498	266.883	1.02348	30.8816	1.3961
	Weighted mean J:					0.0026788 ± 0.0000044 (0.16%)
	Standards: GA1550					Lab #: 1203					Age3: 99.738 ± 0.104 Ma										Heating: 5 s
	Irradiation coordinates: F3
		Power				40Ar*	±σ	39Ar	±σ	38Ar	±σ	37Ar	±σ	36Ar	±σ	D1	±σ	%40Ar*	40Ar*/39ArK	±σ	Ca/K	±σ	Δt	Blank	40Ar	±σ	39Ar	±σ	38Ar	±σ	37Ar	±σ	36Ar	±σ
		(W)				(cps)	(cps)	(cps)	(cps)	(cps)	(cps)	(cps)	(cps)	(cps)	(cps)								(days)	Type2	(cps)	(cps)	(cps)	(cps)	(cps)	(cps)	(cps)	(cps)	(cps)	(cps)
	1203-01	0.6				123273	759.639	5770.35	14.2326	29.5232	2.00548	8.83068	5.43232	55.1336	2.53211	1.00339	0.0013059	88	21.3631	0.141799	0.0028	0.0033	59	LR	6576.36	24.8454	194.158	1.03087	7.09967	0.44262	267.431	1.11017	31.0589	1.14891
	1203-02	0.6				171283	1097.83	8061.01	18.3116	67.9056	2.34387	34.8992	5.17322	187.511	3.64899	1.00341	0.001292	75	21.2484	0.14449	0.0081	0.0022	59	LR	6575.6	23.6949	194.626	0.919247	7.06939	0.470192	267.361	0.989958	31.0969	1.06949
	1203-03	0.6				81366.2	701.513	3805.59	12.1035	32.5529	1.90583	18.8444	5.67627	98.6337	2.33545	1.00343	0.0012782	73	21.3807	0.19648	0.0092	0.0052	59	LR	6574.84	22.5822	195.093	1.02689	7.0392	0.502948	267.29	1.10588	31.1348	1.02827
	1203-04	0.6				180666	594.698	8540.3	17.7305	37.8851	2.23219	30.5115	5.94865	42.9329	1.9646	1.00345	0.0012644	93	21.1545	0.0823275	0.0066	0.0024	59	LR	6573.34	20.5021	196.008	1.02411	6.98616	0.43407	267.732	1.11078	31.2098	1.07204
	1203-05	0.6				250969	668.349	11916.1	24.9884	54.9476	2.6704	37.0019	5.44205	45.9173	2.17997	1.00346	0.0012505	95	21.0613	0.0713898	0.0058	0.0016	59	LR	6572.57	19.515	196.471	0.884688	6.96256	0.407271	268.261	0.98995	31.2482	1.15395
	1203-06	0.6				229071	683.056	10754.6	23.2467	55.7798	2.28611	43.2382	5.94562	49.7406	2.24456	1.00348	0.0012367	94	21.2999	0.0784457	0.00748	0.00191	59	LR	6571.81	18.6035	196.927	0.956647	6.93927	0.476854	268.782	1.10649	31.2861	1.2654
	1203-07	0.6				185050	686.037	8829.61	19.3572	47.1799	2.73138	46.8735	6.37878	36.7838	2.26135	1.0035	0.0012229	94	20.9579	0.0902658	0.0099	0.0025	59	LR	6570.31	17.0182	197.732	0.955741	6.90424	0.497951	269.365	1.18745	31.2809	1.30457
	1203-08	0.6				186715	813.553	8870.65	20.1549	57.597	2.44639	18.1157	5.79567	108.238	2.68701	1.00352	0.001209	85	21.0486	0.103433	0.0038	0.0023	59	LR	6569.48	16.2957	198.119	0.848653	6.89118	0.48914	269.433	1.02995	31.2329	1.20879
	1203-09	0.6				98788.6	623.865	4649.25	12.3908	21.1485	1.74723	17.5896	5.9982	20.7092	2.07404	1.00354	0.0011952	94	21.2483	0.145646	0.007	0.0045	59	LR	6568.72	15.7436	198.473	0.95196	6.87919	0.59253	269.495	0.991572	31.1889	1.13273
	Weighted mean J:					0.0026812 ± 0.0000051 (0.19%)
	Standards: GA1550					Lab #: 1204					Age3: 99.738 ± 0.104 Ma										Heating: 5 s
	Irradiation coordinates: F5
		Power				40Ar*	±σ	39Ar	±σ	38Ar	±σ	37Ar	±σ	36Ar	±σ	D1	±σ	%40Ar*	40Ar*/39ArK	±σ	Ca/K	±σ	Δt	Blank	40Ar	±σ	39Ar	±σ	38Ar	±σ	37Ar	±σ	36Ar	±σ
		(W)				(cps)	(cps)	(cps)	(cps)	(cps)	(cps)	(cps)	(cps)	(cps)	(cps)								(days)	Type2	(cps)	(cps)	(cps)	(cps)	(cps)	(cps)	(cps)	(cps)	(cps)	(cps)
	1204-01	0.6				384386	959.099	18157.7	31.6815	102.305	3.38667	64.0641	6.36597	154.693	3.10567	1.00377	0.0011975	89	21.1693	0.0644538	0.0066	0.0012	59	LR	6565.9	14.7995	200.753	1.02056	6.97715	0.551022	269.762	1.2895	31.0253	0.990123
	1204-02	0.6				176400	633.133	8415.01	17.3762	42.2843	2.36014	38.7974	6.39805	42.0383	2.10083	1.00399	0.0012136	93	20.9625	0.0868014	0.0086	0.0026	59	LR	6565.14	14.8728	201.342	0.854582	7.01764	0.581551	269.861	1.18571	30.9813	0.997776
	1204-03	0.6				142118	669.65	6711.36	17.1874	32.0593	2.17542	71.6322	6.22206	64.7885	2.21865	1.0042	0.0012297	88	21.1758	0.113563	0.0199	0.0032	59	LR	6564.38	15.0861	201.932	0.879852	7.05814	0.667628	269.96	1.09374	30.9372	1.02557
	1204-04	0.6				201010	717.363	9575.22	20.8243	51.1322	2.51726	94.3251	5.6964	81.7282	2.37717	1.00441	0.0012458	89	20.9928	0.0877338	0.0183	0.0021	59	LR	6562.82	15.9298	203.173	0.888678	7.06971	0.722568	270.161	0.956476	30.8473	1.13767
	1204-05	0.6				373584	840.592	17714.2	30.6811	92.0117	3.5908	51.8023	5.62901	130.234	2.73073	1.00462	0.001262	91	21.0895	0.0598832	0.0054	0.0011	59	LR	6562.06	16.5209	203.8	0.85073	7.03767	0.652547	270.26	0.921454	30.8033	1.2145
	1204-07	0.6				517833	985.132	24469.4	41.6057	83.7749	3.90016	221.774	6.06551	138.576	3.15988	1.00505	0.0012942	93	21.1625	0.0539965	0.0169	0.0009	60	LR	6549.93	14.4336	205.395	1.09354	6.94202	0.530027	270.553	0.965721	30.7433	1.11802
	1204-08	0.6				309084	688.425	14569.2	26.956	73.1451	2.85496	67.3745	6.12681	67.1409	2.23287	1.00526	0.0013103	94	21.2149	0.0614285	0.0086	0.0015	60	LR	6539.1	13.4467	205.743	0.93128	6.90994	0.529291	270.652	1.02692	30.772	1.02557
	1204-09	0.6				295436	860.86	13888.5	27.9755	82.6936	2.85754	145.117	5.78304	137.341	2.82906	1.00548	0.0013265	88	21.272	0.0753519	0.0194	0.0014	60	LR	6528.27	15.6455	206.09	0.846221	6.87783	0.550837	270.751	1.10626	30.8006	1.1771
	Weighted mean J:					0.0026823 ± 0.0000042 (0.16%)
	Explanations
	D1: Mass discrimination per AMU based on power law (Renne et al., 2009)
	Blank Type2: Ave = average; LR = linear regression versus time
	Age3: Standard Age of Renne et al., (2011)
	Δt = Time interval (days) between end of irradiation and analysis
	N.D. = negative values indicate that the value is indistinguishable from the background
	Constants Used									Reference
	Atmospheric argon ratios
	(40Ar/36Ar)A					298.56 ± 0.31				Lee et al., (2006)
	Interfering isotope production ratios
	Derived from co-irradiated Fe-doped kalsilite and from CaF2
	(40Ar/39Ar)K					4.7053E-05 ± 1.7377E-05
	(38Ar/39Ar)K					1.1846E-02 ± 5.4865E-05
	(37Ar/39Ar)K					9.8938E-04 ± 8.1820E-05
	(39Ar/37Ar)Ca					6.6527E-04 ± 2.6791E-05
	(38Ar/37Ar)Ca					2.1993E-05 ± 1.7021E-06
	(36Ar/37Ar)Ca					2.7556E-04 ± 2.1719E-06
	(36Cl/38Cl)Cl					263 ± 2
	Decay Constants
	40K λε					5.757E-11 ± 0.016E-11				Renne et al., (2011)
	40K λβ					4.9548E-10 ± 0.0134E-10				Renne et al., (2011)
	39Ar					2.58E-3 ± 2.87E-05 a-1				Stoenner et al. (1965)
	37Ar					7.24E0 ± 1.66E-02 a-1				Renne & Norman (2001)
	36Cl λβ					(2.305)E-6 a-1				Endt (1998)

## Sheet: NT-18-05
	Sample: NT-18-05		Lab #: 1205					J: 0.0026808 ± 0.0000027 (0.10%)
	Material: Muscovite
	Irradiation coordinates: F7																											Blank Corrections												Inverse Isochron
	Run ID	Power	40Ar*	± σ	40Ar	± σ	39Ar	± σ	38Ar	± σ	37Ar	± σ	36Ar	± σ	D1	± σ	%40Ar*	40Ar*/39ArK	±σ	Age	±1σ	1σ (-J)	±2σ	2σ (-J)	Ca/K	± σ	Δt	Blank	40Ar	± σ	39Ar	± σ	38Ar	± σ	37Ar	± σ	36Ar	± σ		39Ar/40Ar	± σ	36Ar/40Ar	± σ
		(watts)	(cps)	(cps)	(cps)	(cps)	(cps)	(cps)	(cps)	(cps)	(cps)	(cps)	(cps)	(cps)						(Ma)	(Ma)	(Ma)	(Ma)	(Ma)			(days)	Type2	(cps)	(cps)	(cps)	(cps)	(cps)	(cps)	(cps)	(cps)	(cps)	(cps)
	1205-01A	0.5	22521.3	556.622	31621.4	42.7189	276.503	4.00883	5.85077	0.904093	22.4989	6.53833	30.48	1.85859	1.00432	0.0013102	71.2217	81.4502	2.33387	357.105	9.29106	9.28541	18.5821	18.5708	0.151347	0.0149758	83	LR	5160.71	14.9968	165.558	0.758739	5.78729	0.419859	194.889	0.74784	24.2308	1.03119		0.00874419	0.000127325	0.000963904	5.87907e-05
	1205-01B	0.8	101314	539.223	110261	63.3667	1036.01	5.82764	6.21261	1.01606	19.0843	7.11647	29.9679	1.79329	1.00387	0.0012979	91.8854	97.7918	0.757292	420.979	2.93249	2.90834	5.86499	5.81668	0.0342629	0.00495705	83	LR	5136.11	13.0894	165.469	0.722986	5.89114	0.400512	195.074	0.755512	23.6063	0.919247		0.00939602	5.31284e-05	0.000271791	1.62649e-05
	1205-01C	0.9	73826.8	505.076	78477.3	55.8615	743.093	4.98717	2.264	1.03643	9.79829	7.39691	15.5765	1.68125	1.00343	0.0012855	94.0741	99.3507	0.952144	426.956	3.66438	3.64459	7.32876	7.28918	0.0245256	0.0141418	83	LR	5111.6	14.3008	165.38	0.857028	5.99462	0.475173	195.258	0.847262	22.984	1.02693		0.00946889	6.39056e-05	0.000198484	2.14239e-05
	1205-01D	0.9	27748.4	455.771	30207.1	39.5806	290.516	4.12507	-0.143202	0.798015	11.3793	7.68059	8.23524	1.52077	1.00298	0.0012732	91.8605	95.5144	2.07379	412.212	8.01146	8.00298	16.0229	16.006	0.0728551	0.0342252	83	LR	5059.23	14.0578	165.161	0.872063	5.98439	0.479206	195.565	0.800793	22.1421	1.02322		0.00961744	0.00013714	0.000272626	5.03461e-05
	1205-01E	1	43777	477.341	49417.4	45.5355	463.184	4.81417	2.88225	0.915265	22.3437	7.06045	18.892	1.5914	1.00253	0.0012608	88.5862	94.5133	1.42375	408.344	5.51828	5.50616	11.0366	11.0123	0.0897254	0.00989176	83	LR	5030.82	11.7253	165.027	0.777826	5.86859	0.410871	195.69	0.742983	21.9181	0.884928		0.00937288	9.78006e-05	0.000382294	3.22051e-05
	1205-01F	1	91598.3	544.316	104683	71.0393	974.42	5.71355	6.31561	1.01024	7.00035	7.4223	43.8254	1.80697	1.00209	0.0012485	87.5008	94.0029	0.784761	406.369	3.06001	3.03828	6.12001	6.07657	0.0133625	0.0151002	83	LR	5002.43	12.107	164.894	0.868701	5.75288	0.439382	195.815	0.861032	21.6942	0.955969		0.00930831	5.4944e-05	0.000418649	1.72637e-05
	1205-01G	1	128996	581.776	140550	88.8073	1357.26	5.81389	7.53469	1.08234	19.7805	7.26876	38.7003	1.92535	1.00198	0.001232	91.7792	95.0414	0.591163	410.385	2.313	2.28367	4.626	4.56734	0.0271073	0.00377655	83	LR	4971.99	11.9473	164.727	0.77942	5.25006	0.386637	195.823	0.811078	20.9553	0.850277		0.00965677	4.18128e-05	0.000275348	1.36998e-05
	1205-01H	1.1	408318	591.614	425399	260.34	4261.46	11.2467	5.52626	1.68076	24.2333	7.45027	57.2126	1.77839	1.00232	0.0012278	95.9846	95.8165	0.288478	413.377	1.17232	1.11255	2.34465	2.2251	0.0105771	0.00102765	83	LR	4971.25	13.3086	164.715	0.807861	5.10747	0.398361	195.78	0.864256	20.7657	0.881303		0.0100175	2.71395e-05	0.000134491	4.18133e-06
	1205-01I	1.1	173097	464.714	172082	121.021	1841.17	8.57745	-2.48311	1.11227	22.4858	8.31797	-3.39698	1.50281	1.00266	0.0012237	100.589	94.0144	0.505507	406.414	1.99064	1.95707	3.98128	3.91415	0.0227157	0.0032143	83	LR	4970.51	15.6896	164.703	0.917136	4.96517	0.450656	195.737	0.996458	20.5764	1.00051		0.0106994	5.04098e-05	-1.97404e-05	-8.73308e-06
	1205-01J	1.2	13755	454.344	14319.5	34.0024	146.721	3.14111	1.19354	0.807842	-1.16644	7.59053	1.89101	1.51752	1.003	0.0012195	96.0573	93.7492	3.6902	405.387	14.2994	14.2947	28.5987	28.5895	-0.0147871	-0.626502	83	LR	5154.62	13.97	165.217	0.874463	4.87275	0.44093	195.878	0.899287	21.0871	0.899287		0.0102462	0.000220703	0.000132058	0.000105976
	1205-01K	1.3	19725.7	471.305	20658	29.825	205.664	3.60677	1.31733	0.786447	2.17479	7.03017	3.12296	1.57543	1.00333	0.0012153	95.4865	95.9122	2.84267	413.746	10.9671	10.9609	21.9343	21.9218	0.0196686	0.205872	83	LR	5282.83	12.67	165.583	0.771903	4.91624	0.415517	196.009	0.852668	21.5843	0.852668		0.00995562	0.000175184	0.000151174	7.62624e-05
	1205-01L	1.4	26065.7	468.346	27183.8	33.9526	275.079	3.31416	0.453814	0.739034	7.68808	8.2593	3.74502	1.56455	1.00367	0.0012112	95.8868	94.7571	2.04991	409.287	7.93209	7.92363	15.8642	15.8473	0.0519844	0.0606225	83	LR	5411.22	13.8484	165.949	0.73589	4.95981	0.433918	196.139	0.968177	22.0821	0.968177		0.0101192	0.00012257	0.000137766	5.75546e-05
	Plateau Age:			411.0 ± 1.7 Ma (2SD)
	Sample: NT-18-05		Lab #: 1205					J: 0.0026808 ± 0.0000027 (0.10%)
	Material: Muscovite
	Irradiation coordinates: F7																											Blank Corrections												Inverse Isochron
	Run ID	Power	40Ar*	± σ	40Ar	± σ	39Ar	± σ	38Ar	± σ	37Ar	± σ	36Ar	± σ	D1	± σ	%40Ar*	40Ar*/39ArK	±σ	Age	±1σ	1σ (-J)	±2σ	2σ (-J)	Ca/K	± σ	Δt	Blank	40Ar	± σ	39Ar	± σ	38Ar	± σ	37Ar	± σ	36Ar	± σ		39Ar/40Ar	± σ	36Ar/40Ar	± σ
		(watts)	(cps)	(cps)	(cps)	(cps)	(cps)	(cps)	(cps)	(cps)	(cps)	(cps)	(cps)	(cps)						(Ma)	(Ma)	(Ma)	(Ma)	(Ma)			(days)	Type2	(cps)	(cps)	(cps)	(cps)	(cps)	(cps)	(cps)	(cps)	(cps)	(cps)
	1205-02A	0.5	19831.8	645.537	40480.3	35.6486	239.86	3.68491	14.0529	1.08189	13.0766	8.02431	69.1604	2.15767	1.00452	0.0013833	48.9912	82.6808	2.976	361.994	11.8127	11.8081	23.6254	23.6163	0.101403	0.0397412	84	LR	5843.03	15.7106	166.167	1.04071	5.10307	0.381337	194.482	0.979434	24.3442	0.859359		0.00592534	9.1179e-05	0.00170849	5.3323e-05
	1205-02B	0.8	97161.2	610.348	108910	61.4915	1009.89	6.16723	4.96643	1.07051	14.8726	8.52586	39.3501	2.03349	1.00403	0.0013891	89.2127	96.2095	0.842887	414.892	3.26907	3.24798	6.53814	6.49596	0.0273921	0.00916904	84	LR	5859.4	13.4613	166.184	0.97032	5.34477	0.342932	194.469	0.874237	24.2429	0.847528		0.00927275	5.68685e-05	0.000361309	1.86725e-05
	1205-02C	0.9	119390	704.619	132393	80.2982	1228.05	6.80914	7.44875	1.18013	15.753	7.8215	43.5527	2.34425	1.00355	0.0013949	90.1784	97.2192	0.787268	418.779	3.05014	3.02714	6.10028	6.05428	0.0238595	0.00601415	84	LR	5875.78	14.3804	166.201	0.918476	5.58664	0.386093	194.455	0.793738	24.1416	0.935498		0.00927578	5.17381e-05	0.000328966	1.77079e-05
	1205-02D	0.9	308945	536.23	314320	180.741	3197.97	10.295	0.176045	1.40161	23.4229	7.6514	18.0006	1.69085	1.00306	0.0014007	98.2902	96.6066	0.353321	416.422	1.41028	1.36033	2.82055	2.72067	0.0136232	0.00149757	84	LR	5900.99	16.3465	166.235	0.882503	5.84837	0.446867	194.428	0.737445	24.2199	0.905774		0.0101743	3.32717e-05	5.72684e-05	5.3795e-06
	1205-02E	1	303166	541.507	310952	220.5	3175.48	10.9222	4.44935	1.39114	26.3214	8.66713	26.0781	1.65633	1.00257	0.0014065	97.4961	95.471	0.370015	412.044	1.47484	1.42806	2.94968	2.85612	0.0154175	0.00172468	84	LR	5909.96	14.8408	166.252	0.900757	5.86812	0.412382	194.414	0.768848	24.4034	0.840629		0.0102121	3.58637e-05	8.38653e-05	5.32699e-06
	1205-02F	1	201964	560.539	202699	110.771	2112.3	7.50336	-0.31359	1.18015	14.832	8.51837	2.46285	1.84045	1.00209	0.0014123	99.6372	95.6131	0.431016	412.592	1.70342	1.66299	3.40684	3.32598	0.0130604	0.00435434	84	LR	5923.57	13.0458	166.278	0.971767	5.89811	0.384018	194.393	0.882725	24.6819	1.03988		0.0104209	3.74527e-05	1.21503e-05	9.07971e-06
	1205-02G	1	128038	495.424	129166	82.9436	1348.73	6.5646	-1.81664	0.948269	17.8265	8.52745	3.77844	1.63595	1.00232	0.0014014	99.1266	94.9326	0.590278	409.965	2.3101	2.28078	4.62019	4.56157	0.0245841	0.00574515	84	LR	5956.96	12.4757	166.182	0.931919	5.97166	0.45421	195.547	0.880259	23.998	0.968022		0.0104418	5.12632e-05	2.92525e-05	1.26655e-05
	1205-02H	1.1	125360	464.306	125957	81.1049	1301.07	7.09753	-0.1965	1.05969	34.3325	7.02069	1.99631	1.53124	1.00304	0.0013847	99.5268	96.3522	0.635317	415.442	2.47537	2.44738	4.95075	4.89477	0.0490817	0.00232018	84	LR	5965.95	13.3415	166.037	0.753962	5.99146	0.499875	195.468	0.813622	23.8586	0.921309		0.0103295	5.67403e-05	1.58492e-05	1.21569e-05
	1205-02I	1.2	97631.4	495.391	98944.4	62.7088	1038.32	6.91688	1.5924	1.06057	19.5776	7.89731	4.39763	1.64591	1.00375	0.001368	98.673	94.0279	0.787385	406.466	3.06994	3.04828	6.13988	6.09656	0.0350702	0.00594025	84	LR	5974.91	14.5392	165.892	0.745	6.0112	0.552303	195.389	0.939835	23.7195	1.09049		0.010494	7.02224e-05	4.44455e-05	1.66348e-05
	1205-02J	1.4	40182	504.568	40144.2	39.061	414.319	4.31714	-1.60133	0.868675	11.3606	8.06684	-0.126676	1.68493	1.00447	0.0013513	100.094	96.9832	1.5825	417.871	6.09939	6.08796	12.1988	12.1759	0.0510008	0.0262463	84	LR	5963.19	12.5203	165.707	0.709299	5.93831	0.498109	195.415	0.980726	22.875	1.14039		0.0103208	0.000108009	-3.15553e-06	-4.19721e-05
	1205-02K	1.5	53289.7	452.918	55094.3	46.6007	569.164	4.54111	0.5906	0.922219	14.8002	7.65649	6.04433	1.50895	1.00519	0.0013347	96.7245	93.6281	1.09145	404.917	4.2446	4.22907	8.4892	8.45813	0.0483663	0.0133299	84	LR	5946.4	12.1089	165.674	0.679178	5.86318	0.434771	195.5	0.858435	22.3035	0.987239		0.0103307	8.28862e-05	0.000109709	2.73885e-05
	1205-02L	1.6	64784.4	463.501	65975.6	50.0833	685.593	5.46837	-2.5928	0.797582	14.5423	8.42798	3.98986	1.54336	1.00591	0.001318	98.1945	94.4939	1.01248	408.269	3.93281	3.91579	7.86563	7.83159	0.0394531	0.013566	84	LR	5928.65	14.2947	165.639	0.795454	5.78378	0.408509	195.59	0.810877	21.6995	0.912895		0.0103916	8.32594e-05	6.04748e-05	2.33929e-05
	Plateau Age:			411.6 ± 1.7 Ma (2SD)
	Explanations
	D1: Mass discrimination per AMU based on power law (Renne et al., 2009)
	Blank Type2: Ave = average; LR = linear regression versus time
	Δt = Time interval (days) between end of irradiation and analysis
	N.D. = negative values indicate that the value is indistinguishable from the background
	Constants Used									Reference
	Atmospheric argon ratios
	(40Ar/36Ar)Air				298.56 ± 0.31					Lee et al., (2006)
	Interfering isotope production ratios
	Derived from co-irradiated Fe-doped kalsilite and from CaF2
	(40Ar/39Ar)K				4.7053E-05 ± 1.7377E-05
	(38Ar/39Ar)K				1.1846E-02 ± 5.4865E-05
	(37Ar/39Ar)K				9.8938E-04 ± 8.1820E-05
	(39Ar/37Ar)Ca				6.6527E-04 ± 2.6791E-05
	(38Ar/37Ar)Ca				2.1993E-05 ± 1.7021E-06
	(36Ar/37Ar)Ca				2.7556E-04 ± 2.1719E-06
	(36Cl/38Cl)Cl				263 ± 2
	Decay Constants
	40K λε				5.757E-11 ± 0.016E-11					Renne et al., (2011)
	40K λβ				4.9548E-10 ± 0.0134E-10					Renne et al., (2011)
	39Ar				2.58E-3 ± 2.87E-05 a-1					Stoenner et al. (1965)
	37Ar				7.24E0 ± 1.66E-02 a-1					Renne & Norman (2001)
	36Cl λβ				(2.305)E-6 a-1					Endt (1998)

[truncated: 2 more sheets: SK-18-02 Standard Data, SK-18-02]
